# Supplementary material
Source: ML conference proceedings conference paper supplement (https://aclanthology.org/P14-2121)
Supplement: Datasets [file Features and Scalar Values for Experiment Sentences.xlsx]

## Sheet: Feature Vector for Survey Resul
DOMAIN	Task 1	Task 2	Task 3	Scalar Metaphoricity	Domain.Ref.Social REL	Domain.Ref.Mental REL	Other.Domain.Ref / Concept	Status.State REL	Status.Process REL	Animacy.Human REL	Animacy.All REL	Main.Animacy / Concept	Other.Animacy / Concept	Fact.Physical REL	Function.None REL	Function.Non-Agentive REL	Function.Institutional REL	Domain.Ref.Types	Status.Types	Animacy.Types	Types.Function
Abstract	0.1	0	0.346	4.68333	0	0	0.5	0.3	0.2	0.4	0.2	0.4	0.6	0.5	0.5	0.2	0.3	3	3	4	4
Abstract	0.563	0.214	0.346	4.60606	0	0.0909091	0.545455	0.181818	0.272727	0.272727	0.181818	0.454545	0.545455	0.363636	0.363636	0	0.454545	3	3	4	3
Abstract	0.2	0.143	0.308	4.99333	0.1	0.1	0.51	0.2	0.3	0.4	0.2	0.4	0.6	0.4	0.4	0	0.4	3	3	4	2
Abstract	0.308	0	0.2	4.11667	0	0.4	0.6	0.2	0.3	0.3	0.3	0.4	0.6	0.3	0.8	0	0.2	1	2	3	4
Abstract	0.308	0.3	0.133	5.68333	0	0.2	0.6	0.3	0.3	0.2	0.3	0.4	0.6	0.5	0.6	0	0.1	3	3	4	2
Abstract	0.5	0.375	0.667	6.05769	0	0.538462	0.461538	0.615385	0.0769231	0.384615	0.538462	0.538462	0.461538	0.769231	0.923077	0	0.0769231	2	3	3	3
Abstract	0.154	0	0.045	4.40878	0.230769	0.153846	0.402367	0.307692	0.153846	0.538462	0.230769	0.538462	0.461538	0.384615	0.384615	0	0.615385	2	3	4	3
Abstract	0.125	0	0.182	5.51667	0	0.333333	0.6	0.333333	0.533333	0.6	0.4	0.6	0.4	0.4	0.466667	0	0.533333	3	3	4	2
Abstract	0.833	0.571	0.773	6.01701	0.0714286	0.285714	0.362245	0.428571	0.214286	0.428571	0.428571	0.428571	0.571429	0.714286	0.642857	0	0.285714	3	3	4	2
Abstract	0.05	0	0.056	4.62925	0.142857	0.142857	0.367347	0.0714286	0.357143	0.5	0.142857	0.5	0.5	0.5	0.571429	0	0.285714	3	3	4	3
Abstract	0.133	0.154	0.333	5.13889	0	0.222222	0.333333	0.222222	0.333333	0.333333	0.333333	0.333333	0.666667	0.555556	0.555556	0.222222	0.222222	3	3	3	2
Abstract	0.769	0.308	0.611	5.79762	0	0.285714	0.428571	0.357143	0.285714	0.5	0.357143	0.5	0.5	0.571429	0.714286	0	0.214286	3	3	4	2
Abstract	0.063	0.077	0.158	5.09091	0	0.272727	0.636364	0.363636	0.272727	0.636364	0.181818	0.636364	0.363636	0.636364	0.636364	0.0909091	0.181818	3	3	3	3
Abstract	0.667	0.125	0.421	5.73718	0	0.153846	0.230769	0.307692	0.0769231	0.384615	0.384615	0.384615	0.615385	0.769231	0.692308	0	0.153846	3	3	4	2
Abstract	0.833	0.286	0.421	5.25	0	0.416667	0.583333	0.25	0.25	0.416667	0.166667	0.416667	0.583333	0.416667	0.75	0	0.25	3	3	4	4
Mental	0	0	0.192	2.69444	0.166667	0	0.194444	0	0.5	1	0	1	0	0.5	0.666667	0	0.333333	2	2	2	2
Mental	0.25	0.125	0.538	4.68056	0.166667	0.25	0.513889	0.25	0.416667	0.666667	0.166667	0.666667	0.333333	0.166667	0.416667	0	0.583333	3	3	4	2
Mental	0.143	0.091	0.269	4.32	0.2	0.2	0.42	0.3	0.2	0.6	0.1	0.6	0.4	0.4	0.5	0	0.4	3	3	3	3
Mental	0	0.167	0.37	4.97222	0	0.222222	0.333333	0.333333	0.222222	0.444444	0.222222	0.444444	0.555556	0.666667	0.555556	0.111111	0.111111	3	3	4	4
Mental	0.143	0.125	0.111	4.01562	0.125	0.125	0.390625	0.375	0.375	0.625	0.125	0.625	0.375	0.375	0.25	0.125	0.625	3	3	3	3
Mental	0.286	0.059	0.481	4.33333	0	0.166667	0.333333	0.333333	0.0833333	0.166667	0.166667	0.583333	0.416667	0.416667	0.416667	0.0833333	0.416667	3	3	4	4
Mental	0.167	0.1	0.071	5.15385	0	0.230769	0.230769	0.230769	0.230769	0.461538	0.307692	0.461538	0.538462	0.769231	0.846154	0	0.153846	2	3	3	2
Mental	0.688	0	0.357	5.34091	0	0.272727	0.545455	0.272727	0.181818	0.363636	0.272727	0.363636	0.636364	0.454545	0.636364	0	0.363636	3	3	3	2
Mental	0.889	0.235	0.571	5.42857	0	0.285714	0.571429	0.428571	0.142857	0.142857	0.428571	0.428571	0.571429	0.571429	0.571429	0	0.285714	3	3	3	3
Mental	0.231	0	0.263	5.25069	0.0909091	0.181818	0.371901	0.363636	0.272727	0.545455	0.272727	0.545455	0.454545	0.636364	0.636364	0	0.272727	3	3	4	3
Mental	0.818	0.455	0.632	5.03748	0.153846	0.307692	0.39645	0.461538	0.384615	0.384615	0.153846	0.384615	0.615385	0.384615	0.384615	0.384615	0.230769	3	3	4	3
Mental	0.357	0	0.105	4.23077	0	0.230769	0.307692	0.230769	0.538462	0.615385	0.230769	0.615385	0.384615	0.307692	0.538462	0	0.384615	3	3	3	3
Mental	0.294	0.091	0.462	5.69048	0	0.214286	0.357143	0.285714	0.142857	0.285714	0.285714	0.285714	0.714286	0.714286	0.785714	0.0714286	0	3	3	4	3
Mental	0	0	0.154	5.31361	0.0769231	0.307692	0.390533	0.461538	0.230769	0.461538	0.307692	0.461538	0.538462	0.692308	0.615385	0.153846	0.230769	3	3	3	3
Mental	0.077	0	0.385	5.75	0	0.285714	0.571429	0.428571	0.214286	0.285714	0.5	0.5	0.5	0.571429	0.642857	0	0.357143	3	3	3	2
Physical	0	0	0.05	3.66667	0	0.111111	0.222222	0.111111	0.222222	0.111111	0.222222	0.444444	0.555556	0.444444	0.666667	0.111111	0.111111	2	2	2	2
Physical	0.8	0.563	0.65	5.18333	0	0.1	0.4	0.2	0.3	0.6	0.2	0.6	0.4	0.7	0.6	0	0.2	3	3	4	2
Physical	0.846	0.571	0.3	6.08333	0	0.166667	0.583333	0.333333	0.25	0.25	0.416667	0.416667	0.583333	0.583333	0.833333	0	0.166667	3	3	4	2
Physical	0.154	0	0	4.45679	0.111111	0	0.0123457	0	0.222222	0.444444	0.111111	0.444444	0.555556	0.888889	0.555556	0.222222	0.111111	3	3	4	3
Physical	1	0.778	0.941	5.83333	0	0.166667	0.416667	0.333333	0.25	0.416667	0.333333	0.416667	0.583333	0.833333	0.916667	0	0	3	3	3	2
Physical	0.2	0	0.059	4.67	0.2	0	0.42	0.3	0.4	0.4	0.3	0.4	0.6	0.4	0.4	0	0.5	3	3	3	2
Physical	0.091	0	0.214	4.61364	0	0	0.181818	0.181818	0.363636	0.545455	0.181818	0.545455	0.454545	0.727273	0.636364	0	0.181818	3	3	3	2
Physical	0.214	0	0.286	5	0	0.166667	0.5	0.333333	0.166667	0.25	0.25	0.416667	0.583333	0.333333	0.583333	0	0.416667	3	3	3	2
Physical	0.615	0.333	0.5	5.53205	0	0.153846	0.461538	0.461538	0.230769	0.153846	0.384615	0.384615	0.615385	0.615385	0.923077	0	0.0769231	3	2	3	2
Physical	0	0.083	0.241	5.66667	0	0.166667	0.5	0.416667	0.25	0.416667	0.25	0.416667	0.583333	0.75	0.75	0.166667	0.0833333	3	3	3	2
Physical	0.737	0.417	0.483	5.625	0	0.375	0.5	0.625	0.25	0.375	0.5	0.5	0.5	0.5	0.625	0	0.375	3	3	3	3
Physical	0.067	0.125	0.276	4.42556	0.133333	0.133333	0.408889	0.2	0.466667	0.333333	0.333333	0.333333	0.666667	0.266667	0.666667	0	0.333333	2	3	3	3
Physical	0.333	0.214	0.412	4.37346	0.111111	0.111111	0.345679	0.111111	0.333333	0.555556	0.222222	0.555556	0.444444	0.666667	0.555556	0	0.222222	3	3	2	2
Physical	0.706	0.214	0.294	5.94697	0	0.454545	0.545455	0.272727	0.272727	0.272727	0.454545	0.454545	0.545455	0.363636	0.727273	0	0.272727	3	3	4	2
Physical	0.5	0	0.294	5.59333	0.1	0.4	0.51	0.2	0.4	0.2	0.3	0.3	0.7	0.4	0.5	0.2	0.2	3	3	4	2
Social	0.143	0	0.133	2.5625	0.25	0.25	0.3125	0	0.5	0.75	0	0.75	0.25	0	0	0	1	2	3	3	3
Social	0.438	0.4	0.733	5.63946	0.142857	0.428571	0.44898	0.285714	0.428571	0.285714	0.285714	0.285714	0.714286	0.428571	0.714286	0	0.285714	3	3	4	3
Social	0.625	0.333	0.133	5.09028	0.0833333	0.0833333	0.506944	0.333333	0.166667	0.25	0.333333	0.333333	0.666667	0.5	0.666667	0	0.333333	3	3	3	3
Social	0.154	0	0.15	4.6219	0.0909091	0.0909091	0.280992	0.272727	0.454545	0.454545	0.181818	0.454545	0.545455	0.363636	0.636364	0.0909091	0.272727	3	3	3	2
Social	0.813	0.65	0.15	6.42424	0	0.363636	0.545455	0.363636	0.0909091	0.363636	0.454545	0.454545	0.545455	0.818182	1	0	0	3	3	4	3
Social	1	0.636	0.7	4.37891	0.0625	0.0625	0.378906	0.1875	0.1875	0.625	0.125	0.625	0.375	0.4375	0.5625	0	0.4375	3	3	3	2
Social	0.133	0	0.091	5.91667	0	0.25	0.416667	0.333333	0.166667	0.333333	0.416667	0.416667	0.583333	0.75	0.916667	0	0	3	3	3	2
Social	0	0	0.227	3.39596	0.230769	0.0769231	0.402367	0.153846	0.307692	0.769231	0.0769231	0.769231	0.230769	0.230769	0.307692	0	0.692308	3	3	2	2
Social	0.4	0.077	0.636	5	0	0.375	0.625	0.375	0	0.5	0.25	0.5	0.5	0.375	0.5	0	0.5	3	3	3	3
Social	0.143	0	0.13	5.27083	0.25	0.333333	0.4375	0.416667	0.0833333	0.333333	0.416667	0.416667	0.583333	0.416667	0.666667	0	0.333333	3	3	3	3
Social	0.143	0.154	0.087	5.63636	0	0.363636	0.545455	0.363636	0.181818	0.272727	0.363636	0.363636	0.636364	0.545455	0.818182	0	0.0909091	3	3	3	3
Social	1	0.769	0.783	4.625	0	0.25	0.25	0.25	0.25	0.5	0.25	0.5	0.5	0.625	0.5	0	0.375	3	3	3	3
Social	0.063	0.1	0.05	4.41667	0	0.166667	0.333333	0.5	0.333333	0.666667	0.333333	0.666667	0.333333	0.5	0.5	0	0.5	3	3	3	4
Social	0	0.077	0.2	4.58333	0	0.0833333	0.416667	0.25	0.25	0.5	0.166667	0.5	0.5	0.416667	0.75	0	0.25	3	3	3	3
Social	0.786	0.667	0.7	5.58333	0	0.142857	0.428571	0.428571	0.142857	0.142857	0.285714	0.428571	0.571429	0.571429	0.571429	0	0.428571	3	3	4	2
