# Supplementary material
Source: ML conference proceedings conference paper supplement (https://aclanthology.org/P14-2121)
Supplement: Datasets [file Features for Experiment Sentences.xlsx]

## Sheet: Feature Vector for Survey Resul
DOMAIN	Task 1	Task 2	Task 3	Domain.Ref.Physical	Domain.Ref.Physical REL	Domain.Ref.Social	Domain.Ref.Social REL	Domain.Ref.Mental	Domain.Ref.Mental REL	Domain.Ref.Abstract	Domain.Ref.Abstract REL	Main.Domain.Ref	Other.Domain.Ref	Domain.Ref.Types	Main.Domain.Ref / Concept	Other.Domain.Ref / Concept	Domain.Sense.Physical	Domain.Sense.Physical REL	Domain.Sense.Social	Domain.Sense.Social REL	Domain.Sense.Mental	Domain.Sense.Mental REL	Domain.Sense.Abstract	Domain.Sense.Abstract REL	Main.Domain.Sense	Other.Domain.Sense	Domain.Sense.Types	Main.Domain.Sense / Concept	Other.Domain.Sense / Concept	Status.Object	Status.Object REL	Status.State	Status.State REL	Status.Process	Status.Process REL	Main.Status	Other.Status	Status.Types	Main.Status / Concept	Other.Status / Concept	Animacy.Human	Animacy.Human REL	Animacy.Animate	Animacy.Animate REL	Animacy.Inanimate	Animacy.Inanimate REL	Animacy.All	Animacy.All REL	Main.Animacy
Abstract	0.1	0	0.346	5	0.5	0	0	0	0	5	0.5	5	5	2	0.5	0.5	2	0.2	2	0.2	0	0	5	0.5	5	4	3	0.5	0.4	5	0.5	3	0.3	2	0.2	5	5	3	0.5	0.5	4	0.4	0	0	4	0.4	2	0.2	4
Abstract	0.563	0.214	0.346	5	0.454545	0	0	1	0.0909091	5	0.454545	5	6	3	0.454545	0.545455	2	0.181818	4	0.363636	1	0.0909091	5	0.454545	5	7	4	0.454545	0.636364	6	0.545455	2	0.181818	3	0.272727	6	5	3	0.545455	0.454545	3	0.272727	1	0.0909091	5	0.454545	2	0.181818	5
Abstract	0.2	0.143	0.308	4	0.4	0.1	0.1	1	0.1	4	0.4	4	5.1	3	0.4	0.51	2	0.2	3	0.3	1	0.1	4	0.4	4	6	4	0.4	0.6	5	0.5	2	0.2	3	0.3	5	5	3	0.5	0.5	4	0.4	0	0	4	0.4	2	0.2	4
Abstract	0.308	0	0.2	2	0.2	0	0	4	0.4	4	0.4	4	6	3	0.4	0.6	2	0.2	1	0.1	4	0.4	4	0.4	4	7	4	0.4	0.7	5	0.5	2	0.2	3	0.3	5	5	3	0.5	0.5	3	0.3	0	0	4	0.4	3	0.3	4
Abstract	0.308	0.3	0.133	4	0.4	0	0	2	0.2	4	0.4	4	6	3	0.4	0.6	2	0.2	0	0	2	0.2	4	0.4	4	4	3	0.4	0.4	4	0.4	3	0.3	3	0.3	4	6	3	0.4	0.6	2	0.2	1	0.1	4	0.4	3	0.3	4
Abstract	0.5	0.375	0.667	3	0.230769	0	0	7	0.538462	3	0.230769	7	6	3	0.538462	0.461538	4	0.307692	0	0	7	0.538462	3	0.230769	7	7	3	0.538462	0.538462	4	0.307692	8	0.615385	1	0.0769231	8	5	3	0.615385	0.384615	5	0.384615	0	0	1	0.0769231	7	0.538462	7
Abstract	0.154	0	0.045	5	0.384615	0.230769	0.230769	2	0.153846	3	0.230769	5	5.23077	3	0.384615	0.402367	2	0.153846	5	0.384615	2	0.153846	3	0.230769	5	7	4	0.384615	0.538462	7	0.538462	4	0.307692	2	0.153846	7	6	3	0.538462	0.461538	7	0.538462	0	0	3	0.230769	3	0.230769	7
Abstract	0.125	0	0.182	6	0.4	0	0	5	0.333333	4	0.266667	6	9	3	0.4	0.6	1	0.0666667	7	0.466667	5	0.333333	4	0.266667	7	10	4	0.466667	0.666667	2	0.133333	5	0.333333	8	0.533333	8	7	3	0.533333	0.466667	9	0.6	0	0	0	0	6	0.4	9
Abstract	0.833	0.571	0.773	8	0.571429	0.0714286	0.0714286	4	0.285714	1	0.0714286	8	5.07143	3	0.571429	0.362245	4	0.285714	4	0.285714	4	0.285714	1	0.0714286	4	9	4	0.285714	0.642857	5	0.357143	6	0.428571	3	0.214286	6	8	3	0.428571	0.571429	6	0.428571	0	0	2	0.142857	6	0.428571	6
Abstract	0.05	0	0.056	7	0.5	0.142857	0.142857	2	0.142857	3	0.214286	7	5.14286	3	0.5	0.367347	4	0.285714	4	0.285714	2	0.142857	3	0.214286	4	9	4	0.285714	0.642857	8	0.571429	1	0.0714286	5	0.357143	8	6	3	0.571429	0.428571	7	0.5	0	0	5	0.357143	2	0.142857	7
Abstract	0.133	0.154	0.333	6	0.666667	0	0	2	0.222222	1	0.111111	6	3	3	0.666667	0.333333	4	0.444444	1	0.111111	2	0.222222	1	0.111111	4	4	4	0.444444	0.444444	4	0.444444	2	0.222222	3	0.333333	4	5	3	0.444444	0.555556	3	0.333333	0	0	3	0.333333	3	0.333333	3
Abstract	0.769	0.308	0.611	8	0.571429	0	0	4	0.285714	2	0.142857	8	6	3	0.571429	0.428571	4	0.285714	2	0.142857	4	0.285714	2	0.142857	4	8	4	0.285714	0.571429	5	0.357143	5	0.357143	4	0.285714	5	9	3	0.357143	0.642857	7	0.5	0	0	2	0.142857	5	0.357143	7
Abstract	0.063	0.077	0.158	4	0.363636	0	0	3	0.272727	4	0.363636	4	7	3	0.363636	0.636364	3	0.272727	1	0.0909091	3	0.272727	4	0.363636	4	7	4	0.363636	0.636364	4	0.363636	4	0.363636	3	0.272727	4	7	3	0.363636	0.636364	7	0.636364	0	0	2	0.181818	2	0.181818	7
Abstract	0.667	0.125	0.421	10	0.769231	0	0	2	0.153846	1	0.0769231	10	3	3	0.769231	0.230769	7	0.538462	1	0.0769231	2	0.153846	1	0.0769231	7	4	4	0.538462	0.307692	8	0.615385	4	0.307692	1	0.0769231	8	5	3	0.615385	0.384615	5	0.384615	0	0	3	0.230769	5	0.384615	5
Abstract	0.833	0.286	0.421	4	0.333333	0	0	5	0.416667	3	0.25	5	7	3	0.416667	0.583333	4	0.333333	2	0.166667	5	0.416667	3	0.25	5	9	4	0.416667	0.75	6	0.5	3	0.25	3	0.25	6	6	3	0.5	0.5	5	0.416667	2	0.166667	3	0.25	2	0.166667	5
Mental	0	0	0.192	4	0.666667	0.166667	0.166667	0	0	1	0.166667	4	1.16667	2	0.666667	0.194444	3	0.5	2	0.333333	0	0	1	0.166667	3	3	3	0.5	0.5	3	0.5	0	0	3	0.5	3	3	2	0.5	0.5	6	1	0	0	0	0	0	0	6
Mental	0.25	0.125	0.538	3	0.25	0.166667	0.166667	3	0.25	4	0.333333	4	6.16667	3	0.333333	0.513889	2	0.166667	6	0.5	3	0.25	4	0.333333	6	9	4	0.5	0.75	4	0.333333	3	0.25	5	0.416667	5	7	3	0.416667	0.583333	8	0.666667	1	0.0833333	1	0.0833333	2	0.166667	8
Mental	0.143	0.091	0.269	4	0.4	0.2	0.2	2	0.2	2	0.2	4	4.2	3	0.4	0.42	3	0.3	4	0.4	2	0.2	2	0.2	4	7	4	0.4	0.7	5	0.5	3	0.3	2	0.2	5	5	3	0.5	0.5	6	0.6	0	0	3	0.3	1	0.1	6
Mental	0	0.167	0.37	6	0.666667	0	0	2	0.222222	1	0.111111	6	3	3	0.666667	0.333333	5	0.555556	1	0.111111	2	0.222222	1	0.111111	5	4	4	0.555556	0.444444	4	0.444444	3	0.333333	2	0.222222	4	5	3	0.444444	0.555556	4	0.444444	1	0.111111	2	0.222222	2	0.222222	4
Mental	0.143	0.125	0.111	4	0.5	0.125	0.125	1	0.125	2	0.25	4	3.125	3	0.5	0.390625	1	0.125	4	0.5	1	0.125	2	0.25	4	4	4	0.5	0.5	2	0.25	3	0.375	3	0.375	3	5	3	0.375	0.625	5	0.625	0	0	2	0.25	1	0.125	5
Mental	0.286	0.059	0.481	8	0.666667	0	0	2	0.166667	2	0.166667	8	4	3	0.666667	0.333333	4	0.333333	2	0.166667	2	0.166667	2	0.166667	4	6	4	0.333333	0.5	7	0.583333	4	0.333333	1	0.0833333	7	5	3	0.583333	0.416667	2	0.166667	1	0.0833333	7	0.583333	2	0.166667	7
Mental	0.167	0.1	0.071	10	0.769231	0	0	3	0.230769	0	0	10	3	2	0.769231	0.230769	8	0.615385	1	0.0769231	3	0.230769	0	0	8	4	3	0.615385	0.307692	7	0.538462	3	0.230769	3	0.230769	7	6	3	0.538462	0.461538	6	0.461538	0	0	3	0.230769	4	0.307692	6
Mental	0.688	0	0.357	3	0.272727	0	0	3	0.272727	5	0.454545	5	6	3	0.454545	0.545455	2	0.181818	2	0.181818	3	0.272727	5	0.454545	5	7	4	0.454545	0.636364	6	0.545455	3	0.272727	2	0.181818	6	5	3	0.545455	0.454545	4	0.363636	0	0	4	0.363636	3	0.272727	4
Mental	0.889	0.235	0.571	2	0.285714	0	0	2	0.285714	3	0.428571	3	4	3	0.428571	0.571429	1	0.142857	1	0.142857	2	0.285714	3	0.428571	3	4	4	0.428571	0.571429	3	0.428571	3	0.428571	1	0.142857	3	4	3	0.428571	0.571429	1	0.142857	0	0	3	0.428571	3	0.428571	3
Mental	0.231	0	0.263	6	0.545455	0.0909091	0.0909091	2	0.181818	2	0.181818	6	4.09091	3	0.545455	0.371901	4	0.363636	4	0.363636	2	0.181818	2	0.181818	4	8	4	0.363636	0.727273	4	0.363636	4	0.363636	3	0.272727	4	7	3	0.363636	0.636364	6	0.545455	1	0.0909091	1	0.0909091	3	0.272727	6
Mental	0.818	0.455	0.632	6	0.461538	0.153846	0.153846	4	0.307692	1	0.0769231	6	5.15385	3	0.461538	0.39645	6	0.461538	3	0.230769	4	0.307692	1	0.0769231	6	8	4	0.461538	0.615385	2	0.153846	6	0.461538	5	0.384615	6	7	3	0.461538	0.538462	5	0.384615	3	0.230769	3	0.230769	2	0.153846	5
Mental	0.357	0	0.105	9	0.692308	0	0	3	0.230769	1	0.0769231	9	4	3	0.692308	0.307692	2	0.153846	5	0.384615	3	0.230769	1	0.0769231	5	6	4	0.384615	0.461538	3	0.230769	3	0.230769	7	0.538462	7	6	3	0.538462	0.461538	8	0.615385	2	0.153846	0	0	3	0.230769	8
Mental	0.294	0.091	0.462	9	0.642857	0	0	3	0.214286	2	0.142857	9	5	3	0.642857	0.357143	8	0.571429	0	0	3	0.214286	2	0.142857	8	5	3	0.571429	0.357143	8	0.571429	4	0.285714	2	0.142857	8	6	3	0.571429	0.428571	4	0.285714	2	0.142857	4	0.285714	4	0.285714	4
Mental	0	0	0.154	7	0.538462	0.0769231	0.0769231	4	0.307692	1	0.0769231	7	5.07692	3	0.538462	0.390533	4	0.307692	3	0.230769	4	0.307692	1	0.0769231	4	8	4	0.307692	0.615385	4	0.307692	6	0.461538	3	0.230769	6	7	3	0.461538	0.538462	6	0.461538	0	0	3	0.230769	4	0.307692	6
Mental	0.077	0	0.385	6	0.428571	0	0	4	0.285714	4	0.285714	6	8	3	0.428571	0.571429	3	0.214286	4	0.285714	4	0.285714	4	0.285714	4	11	4	0.285714	0.785714	5	0.357143	6	0.428571	3	0.214286	6	8	3	0.428571	0.571429	4	0.285714	0	0	3	0.214286	7	0.5	7
Physical	0	0	0.05	7	0.777778	0	0	1	0.111111	1	0.111111	7	2	3	0.777778	0.222222	4	0.444444	1	0.111111	1	0.111111	1	0.111111	4	3	4	0.444444	0.333333	6	0.666667	1	0.111111	2	0.222222	6	3	3	0.666667	0.333333	1	0.111111	2	0.222222	4	0.444444	2	0.222222	4
Physical	0.8	0.563	0.65	6	0.6	0	0	1	0.1	3	0.3	6	4	3	0.6	0.4	3	0.3	5	0.5	1	0.1	3	0.3	5	7	4	0.5	0.7	5	0.5	2	0.2	3	0.3	5	5	3	0.5	0.5	6	0.6	1	0.1	1	0.1	2	0.2	6
Physical	0.846	0.571	0.3	5	0.416667	0	0	2	0.166667	5	0.416667	5	7	3	0.416667	0.583333	3	0.25	3	0.25	2	0.166667	5	0.416667	5	8	4	0.416667	0.666667	5	0.416667	4	0.333333	3	0.25	5	7	3	0.416667	0.583333	3	0.25	1	0.0833333	3	0.25	5	0.416667	5
Physical	0.154	0	0	8	0.888889	0.111111	0.111111	0	0	0	0	8	0.111111	1	0.888889	0.0123457	7	0.777778	1	0.111111	0	0	0	0	7	1	2	0.777778	0.111111	7	0.777778	0	0	2	0.222222	7	2	2	0.777778	0.222222	4	0.444444	0	0	4	0.444444	1	0.111111	4
Physical	1	0.778	0.941	7	0.583333	0	0	2	0.166667	3	0.25	7	5	3	0.583333	0.416667	8	0.666667	0	0	2	0.166667	3	0.25	8	5	3	0.666667	0.416667	5	0.416667	4	0.333333	3	0.25	5	7	3	0.416667	0.583333	5	0.416667	1	0.0833333	2	0.166667	4	0.333333	5
Physical	0.2	0	0.059	4	0.4	0.2	0.2	0	0	4	0.4	4	4.2	2	0.4	0.42	2	0.2	4	0.4	0	0	4	0.4	4	6	3	0.4	0.6	3	0.3	3	0.3	4	0.4	4	6	3	0.4	0.6	4	0.4	0	0	3	0.3	3	0.3	4
Physical	0.091	0	0.214	9	0.818182	0	0	0	0	2	0.181818	9	2	2	0.818182	0.181818	6	0.545455	2	0.181818	0	0	2	0.181818	6	4	3	0.545455	0.363636	5	0.454545	2	0.181818	4	0.363636	5	6	3	0.454545	0.545455	6	0.545455	2	0.181818	1	0.0909091	2	0.181818	6
Physical	0.214	0	0.286	6	0.5	0	0	2	0.166667	4	0.333333	6	6	3	0.5	0.5	2	0.166667	3	0.25	2	0.166667	4	0.333333	4	7	4	0.333333	0.583333	6	0.5	4	0.333333	2	0.166667	6	6	3	0.5	0.5	3	0.25	1	0.0833333	5	0.416667	3	0.25	5
Physical	0.615	0.333	0.5	7	0.538462	0	0	2	0.153846	4	0.307692	7	6	3	0.538462	0.461538	4	0.307692	2	0.153846	2	0.153846	4	0.307692	4	8	4	0.307692	0.615385	4	0.307692	6	0.461538	3	0.230769	6	7	3	0.461538	0.538462	2	0.153846	3	0.230769	3	0.230769	5	0.384615	5
Physical	0	0.083	0.241	6	0.5	0	0	2	0.166667	4	0.333333	6	6	3	0.5	0.5	6	0.5	0	0	2	0.166667	4	0.333333	6	6	3	0.5	0.5	4	0.333333	5	0.416667	3	0.25	5	7	3	0.416667	0.583333	5	0.416667	2	0.166667	2	0.166667	3	0.25	5
Physical	0.737	0.417	0.483	4	0.5	0	0	3	0.375	1	0.125	4	4	3	0.5	0.5	1	0.125	2	0.25	3	0.375	1	0.125	3	4	4	0.375	0.5	1	0.125	5	0.625	2	0.25	5	3	3	0.625	0.375	3	0.375	1	0.125	0	0	4	0.5	4
Physical	0.067	0.125	0.276	4	0.266667	0.133333	0.133333	2	0.133333	7	0.466667	7	6.13333	3	0.466667	0.408889	3	0.2	5	0.333333	2	0.133333	7	0.466667	7	10	4	0.466667	0.666667	5	0.333333	3	0.2	7	0.466667	7	8	3	0.466667	0.533333	5	0.333333	2	0.133333	3	0.2	5	0.333333	5
Physical	0.333	0.214	0.412	5	0.555556	0.111111	0.111111	1	0.111111	2	0.222222	5	3.11111	3	0.555556	0.345679	5	0.555556	1	0.111111	1	0.111111	2	0.222222	5	4	4	0.555556	0.444444	5	0.555556	1	0.111111	3	0.333333	5	4	3	0.555556	0.444444	5	0.555556	0	0	2	0.222222	2	0.222222	5
Physical	0.706	0.214	0.294	4	0.363636	0	0	5	0.454545	2	0.181818	5	6	3	0.454545	0.545455	2	0.181818	2	0.181818	5	0.454545	2	0.181818	5	6	4	0.454545	0.545455	5	0.454545	3	0.272727	3	0.272727	5	6	3	0.454545	0.545455	3	0.272727	1	0.0909091	2	0.181818	5	0.454545	5
Physical	0.5	0	0.294	4	0.4	0.1	0.1	4	0.4	1	0.1	4	5.1	3	0.4	0.51	4	0.4	1	0.1	4	0.4	1	0.1	4	6	4	0.4	0.6	4	0.4	2	0.2	4	0.4	4	6	3	0.4	0.6	2	0.2	2	0.2	3	0.3	3	0.3	3
Social	0.143	0	0.133	2	0.5	0.25	0.25	1	0.25	0	0	2	1.25	2	0.5	0.3125	0	0	3	0.75	1	0.25	0	0	3	1	2	0.75	0.25	2	0.5	0	0	2	0.5	2	2	2	0.5	0.5	3	0.75	0	0	1	0.25	0	0	3
Social	0.438	0.4	0.733	2	0.285714	0.142857	0.142857	3	0.428571	1	0.142857	3	3.14286	3	0.428571	0.44898	2	0.285714	1	0.142857	3	0.428571	1	0.142857	3	4	4	0.428571	0.571429	2	0.285714	2	0.285714	3	0.428571	3	4	3	0.428571	0.571429	2	0.285714	2	0.285714	1	0.142857	2	0.285714	2
Social	0.625	0.333	0.133	5	0.416667	0.0833333	0.0833333	1	0.0833333	5	0.416667	5	6.08333	3	0.416667	0.506944	3	0.25	3	0.25	1	0.0833333	5	0.416667	5	7	4	0.416667	0.583333	6	0.5	4	0.333333	2	0.166667	6	6	3	0.5	0.5	3	0.25	1	0.0833333	4	0.333333	4	0.333333	4
Social	0.154	0	0.15	7	0.636364	0.0909091	0.0909091	1	0.0909091	2	0.181818	7	3.09091	3	0.636364	0.280992	3	0.272727	4	0.363636	1	0.0909091	2	0.181818	4	6	4	0.363636	0.545455	3	0.272727	3	0.272727	5	0.454545	5	6	3	0.454545	0.545455	5	0.454545	2	0.181818	2	0.181818	2	0.181818	5
Social	0.813	0.65	0.15	5	0.454545	0	0	4	0.363636	2	0.181818	5	6	3	0.454545	0.545455	5	0.454545	0	0	4	0.363636	2	0.181818	5	6	3	0.454545	0.545455	6	0.545455	4	0.363636	1	0.0909091	6	5	3	0.545455	0.454545	4	0.363636	0	0	2	0.181818	5	0.454545	5
Social	1	0.636	0.7	9	0.5625	0.0625	0.0625	1	0.0625	5	0.3125	9	6.0625	3	0.5625	0.378906	5	0.3125	6	0.375	1	0.0625	5	0.3125	6	11	4	0.375	0.6875	10	0.625	3	0.1875	3	0.1875	10	6	3	0.625	0.375	10	0.625	0	0	4	0.25	2	0.125	10
Social	0.133	0	0.091	7	0.583333	0	0	3	0.25	2	0.166667	7	5	3	0.583333	0.416667	5	0.416667	0	0	3	0.25	2	0.166667	5	5	3	0.416667	0.416667	6	0.5	4	0.333333	2	0.166667	6	6	3	0.5	0.5	4	0.333333	0	0	3	0.25	5	0.416667	5
Social	0	0	0.227	5	0.384615	0.230769	0.230769	1	0.0769231	4	0.307692	5	5.23077	3	0.384615	0.402367	2	0.153846	8	0.615385	1	0.0769231	4	0.307692	8	7	4	0.615385	0.538462	7	0.538462	2	0.153846	4	0.307692	7	6	3	0.538462	0.461538	10	0.769231	0	0	2	0.153846	1	0.0769231	10
Social	0.4	0.077	0.636	2	0.25	0	0	3	0.375	3	0.375	3	5	3	0.375	0.625	1	0.125	3	0.375	3	0.375	3	0.375	3	7	4	0.375	0.875	5	0.625	3	0.375	0	0	5	3	2	0.625	0.375	4	0.5	0	0	2	0.25	2	0.25	4
Social	0.143	0	0.13	1	0.0833333	0.25	0.25	4	0.333333	4	0.333333	4	5.25	3	0.333333	0.4375	1	0.0833333	4	0.333333	4	0.333333	4	0.333333	4	9	4	0.333333	0.75	6	0.5	5	0.416667	1	0.0833333	6	6	3	0.5	0.5	4	0.333333	0	0	3	0.25	5	0.416667	5
Social	0.143	0.154	0.087	2	0.181818	0	0	4	0.363636	5	0.454545	5	6	3	0.454545	0.545455	1	0.0909091	1	0.0909091	4	0.363636	5	0.454545	5	6	4	0.454545	0.545455	5	0.454545	4	0.363636	2	0.181818	5	6	3	0.454545	0.545455	3	0.272727	0	0	4	0.363636	4	0.363636	4
Social	1	0.769	0.783	6	0.75	0	0	2	0.25	0	0	6	2	2	0.75	0.25	5	0.625	0	0	2	0.25	0	0	5	2	2	0.625	0.25	4	0.5	2	0.25	2	0.25	4	4	3	0.5	0.5	4	0.5	0	0	2	0.25	2	0.25	4
Social	0.063	0.1	0.05	4	0.666667	0	0	1	0.166667	1	0.166667	4	2	3	0.666667	0.333333	1	0.166667	3	0.5	1	0.166667	1	0.166667	3	3	4	0.5	0.5	1	0.166667	3	0.5	2	0.333333	3	3	3	0.5	0.5	4	0.666667	0	0	0	0	2	0.333333	4
Social	0	0.077	0.2	7	0.583333	0	0	1	0.0833333	4	0.333333	7	5	3	0.583333	0.416667	5	0.416667	3	0.25	1	0.0833333	4	0.333333	5	8	4	0.416667	0.666667	6	0.5	3	0.25	3	0.25	6	6	3	0.5	0.5	6	0.5	2	0.166667	2	0.166667	2	0.166667	6
Social	0.786	0.667	0.7	4	0.571429	0	0	1	0.142857	2	0.285714	4	3	3	0.571429	0.428571	1	0.142857	2	0.285714	1	0.142857	2	0.285714	2	4	4	0.285714	0.571429	3	0.428571	3	0.428571	1	0.142857	3	4	3	0.428571	0.571429	1	0.142857	1	0.142857	3	0.428571	2	0.285714	3
[truncated: 31 more columns]
