# Supplementary material
Source: ML conference proceedings conference paper supplement (https://aclanthology.org/P14-2121)
Supplement: Datasets [file Task 3 Results.Sentence Ordering.xlsx]

## Sheet: Sheet1
DOMAIN	ID	TYPE	WORD	#1	#2	#3	Metaphoricity	SENTENCE
Abstract	1a	Literal	decipher	17	0	9	0.346154	It was only 100 years ago that people were beginning to decipher the Rosetta Stone.
Abstract	1b	Low	decipher	5	12	9	0.346154	More and more restaurants are energetically finding ways to help customers decipher their wine lists.
Abstract	1c	High	decipher	4	14	8	0.307692	It was essential to dress according to your status and to be able to decipher other people's attire.
Abstract	2a	Literal	compute	9	3	3	0.2	Furthermore, frequencies are used to compute various descriptive statistics, which are useful for interpreting the data.
Abstract	2b	Low	compute	3	10	2	0.133333	Wall Street is trying to compute what structural changes are next as IBM reinvents itself.
Abstract	2c	High	compute	3	2	10	0.666667	When I compute his unfailing greatness of spirit and the tenacity of his benevolence, I am filled with immense respect.
Abstract	3a	Literal	invest	14	7	1	0.0454545	The banks and the corporations in America today have lots of money that they can invest right now.
Abstract	3b	Low	invest	7	11	4	0.181818	In seminars, students invest their efforts in discussions and research on special topics under the guidance of a leader.
Abstract	3c	High	invest	2	3	17	0.772727	A lady on high heels clacked along, the type my mother says invests all of her brainpower in her looks.
Abstract	4a	Literal	program	10	7	1	0.0555556	The computer is programmed to interpret the information and send a command to the synthesizer, which results in music.
Abstract	4b	Low	program	4	8	6	0.333333	The researchers do not culture any cells that are programmed to turn into a placenta.
Abstract	4c	High	program	4	3	11	0.611111	They don't know whether the children have been programmed, in essence, to say what they say on the stand.
Abstract	5a	Literal	subtract	12	4	3	0.157895	At the end, you'll add or subtract this tally from a life expectancy that's average for men your age.
Abstract	5b	Low	subtract	3	8	8	0.421053	The intense light on the DVD player subtracts from the mood created by the candlelight.
Abstract	5c	High	subtract	4	7	8	0.421053	I wanted to find out what was left over when I subtracted my professional identity from who I was.
Mental	1a	Literal	convince	16	5	5	0.192308	I'm not telling you to defend yourself or to convince him of anything.
Mental	1b	Low	convince	6	6	14	0.538462	A central bank judges that it does not need to act whenever the market is convinced that it will act!
Mental	1c	High	convince	4	15	7	0.269231	A quick primer on franchise law convinced him that he had been wrong.
Mental	2a	Literal	enjoy	12	5	10	0.37037	The pair sat out on their deck to enjoy the delicious meal.
Mental	2b	Low	enjoy	11	13	3	0.111111	Meanwhile, the industry has enjoyed several profitable years.
Mental	2c	High	enjoy	6	8	13	0.481481	Architectural salvage dates to the late 19th century, a time when cast-iron building ornamentation enjoyed great popularity.
Mental	3a	Literal	imagine	10	3	1	0.0714286	He imagines an old farmer driving his pickup out in the afternoon to fling balding tires into the ravine.
Mental	3b	Low	imagine	3	6	5	0.357143	Shaw's comedy imagines a rousing debate of ideas between notable figures of the late 17th century.
Mental	3c	High	imagine	1	5	8	0.571429	A truncated notion of subjectivity imagines subjects all closed up within themselves.
Mental	4a	Literal	offend	10	4	5	0.263158	Equally likely, maybe they will do or say something to offend the person with the disability.
Mental	4b	Low	offend	5	2	12	0.631579	Advertising will almost surely offend some extremist positions, so marketers will have to have thicker skins.
Mental	4c	High	offend	4	13	2	0.105263	The Brown decision says that racial classifications offend the Constitution only when they create feelings of inferiority.
Mental	5a	Literal	see	4	3	6	0.461538	He saw in the faint moonlight a figure kneeling on the floor before the desk.
Mental	5b	Low	see	5	6	2	0.153846	The 1970 regular season, the first post-merger season, saw the Patriots relocate to historic Harvard Stadium.
Mental	5c	High	see	4	4	5	0.384615	The percentage of new homes completed in the United States saw a slight uptick recently after decades of decline.
Physical	1a	Literal	butcher	19	0	1	0.05	Today the area's animals are getting butchered for much-needed meat.
Physical	1b	Low	butcher	1	6	13	0.65	If we butcher a weaker opponent for no good cause, then our battle against the enemy becomes tainted.
Physical	1c	High	butcher	0	14	6	0.3	I've seen the details butchered more than once in other accounts, so that was a nice change
Physical	2a	Literal	detach	6	11	0	0	The bacteria will detach from the surface of a cell at the slightest joggle.
Physical	2b	Low	detach	1	0	16	0.941176	A man sits bowed down by guilt, as if he can't quite detach himself from the earth's crust.
Physical	2c	High	detach	10	6	1	0.0588235	Single-payer health care models detach employment or health status from coverage and premium amount
Physical	3a	Literal	jump	8	3	3	0.214286	The father arrives in his blue uniform, and both boys jump up to salute him.
Physical	3b	Low	jump	3	7	4	0.285714	In yesterday's auction, interest rates on short-term Treasury securities jumped to the highest level since January.
Physical	3c	High	jump	3	4	7	0.5	Since most couples live together first, you don't have a whole new life to jump into, Greer points out.
Physical	4a	Literal	migrate	18	4	7	0.241379	I know the swans from up north migrate to Lake Matamuskeet every winter, but I guess they came here this time.
Physical	4b	Low	migrate	4	11	14	0.482759	In this difficult economy, people migrate to value, and Walmart stands for value.
Physical	4c	High	migrate	7	14	8	0.275862	Democrats warn that once the new precedent is set, it can easily migrate to other nominations and even legislation.
Physical	5a	Literal	throw	8	2	7	0.411765	Well, then we will throw the money out of the moving car.
Physical	5b	Low	throw	6	6	5	0.294118	The plan doesn't simply throw a lot of new money around or create a lot of new bureaucracy.
Physical	5c	High	throw	3	9	5	0.294118	Few asked about my hip, and no one thought to throw any casual encouragement my way.
Social	1a	Literal	buy	12	1	2	0.133333	People buy lottery tickets everyday. It's a habit.
Social	1b	Low	buy	1	3	11	0.733333	It's a desperate gamble to buy us time to refit and retrain.
Social	1c	High	buy	2	11	2	0.133333	What exactly does this sassiness buy him? More national media publicity in the last four years than other representatives.
Social	2a	Literal	marry	14	3	3	0.15	I'd been wanting to ask Sara to marry me for more than a year, but I kept putting it off.
Social	2b	Low	marry	3	14	3	0.15	The showpiece is a pricey MacBook Pro that basically marries the ultrathin MacBook Air with the sharpness of the iPad.
Social	2c	High	marry	3	3	14	0.7	In order to divorce, you have to be married. We never married the Soviet Union. We were raped during the 50 years.
Social	3a	Literal	neglect	6	14	2	0.0909091	The plan may not be enough to make an impact on real criminals, such as wife-beaters or those who neglect their children.
Social	3b	Low	neglect	12	5	5	0.227273	The story neglected to include senior judges and department heads among the 43 retirees who have returned to work.
Social	3c	High	neglect	6	2	14	0.636364	Both theoretical viewpoints seem to neglect the ambivalent state of Zulu political transformations.
Social	4a	Literal	obey	10	10	3	0.130435	All societies have rules or laws and require their members to obey them for the peace and good order of that society.
Social	4b	Low	obey	10	11	2	0.0869565	After all, a baseball must obey the laws of physics, and there was a well-established theory and sufficient data available.
Social	4c	High	obey	3	2	18	0.782609	Tomorrow obeys a futurist the way lightning obeys a weatherman.
Social	5a	Literal	punish	13	6	1	0.05	How should we punish these children - according to their age or their crime?
Social	5b	Low	punish	6	10	4	0.2	Put simply, criminal law punishes the defendant because of what he has done in the past.
Social	5c	High	punish	2	4	14	0.7	That was a remark for which her sleek body would punish me all night long.
