# Supplementary material
Source: ML conference proceedings conference paper supplement (https://aclanthology.org/P14-2121)
Supplement: Datasets [file Task Results.Correlation.xlsx]

## Sheet: Sheet1
DOMAIN	ID	TYPE	WORD	Task 1	Task 2	Task 3	SENTENCE
Abstract	1a	Literal	decipher	0.1	0	0.346154	It was only 100 years ago that people were beginning to decipher the Rosetta Stone.
Abstract	1b	Low	decipher	0.5625	0.214286	0.346154	More and more restaurants are energetically finding ways to help customers decipher their wine lists.
Abstract	1c	High	decipher	0.2	0.142857	0.307692	It was essential to dress according to your status and to be able to decipher other people's attire.
Abstract	2a	Literal	compute	0.307692	0	0.2	Furthermore, frequencies are used to compute various descriptive statistics, which are useful for interpreting the data.
Abstract	2b	Low	compute	0.307692	0.3	0.133333	Wall Street is trying to compute what structural changes are next as IBM reinvents itself.
Abstract	2c	High	compute	0.5	0.375	0.666667	When I compute his unfailing greatness of spirit and the tenacity of his benevolence, I am filled with immense respect.
Abstract	3a	Literal	invest	0.153846	0	0.0454545	The banks and the corporations in America today have lots of money that they can invest right now.
Abstract	3b	Low	invest	0.125	0	0.181818	In seminars, students invest their efforts in discussions and research on special topics under the guidance of a leader.
Abstract	3c	High	invest	0.833333	0.571429	0.772727	A lady on high heels clacked along, the type my mother says invests all of her brainpower in her looks.
Abstract	4a	Literal	program	0.05	0	0.0555556	The computer is programmed to interpret the information and send a command to the synthesizer, which results in music.
Abstract	4b	Low	program	0.133333	0.153846	0.333333	The researchers do not culture any cells that are programmed to turn into a placenta.
Abstract	4c	High	program	0.769231	0.307692	0.611111	They don't know whether the children have been programmed, in essence, to say what they say on the stand.
Abstract	5a	Literal	subtract	0.0625	0.0769231	0.157895	At the end, you'll add or subtract this tally from a life expectancy that's average for men your age.
Abstract	5b	Low	subtract	0.666667	0.125	0.421053	The intense light on the DVD player subtracts from the mood created by the candlelight.
Abstract	5c	High	subtract	0.833333	0.285714	0.421053	I wanted to find out what was left over when I subtracted my professional identity from who I was.
Mental	1a	Literal	convince	0	0	0.192308	I'm not telling you to defend yourself or to convince him of anything.
Mental	1b	Low	convince	0.25	0.125	0.538462	A central bank judges that it does not need to act whenever the market is convinced that it will act!
Mental	1c	High	convince	0.142857	0.0909091	0.269231	A quick primer on franchise law convinced him that he had been wrong.
Mental	2a	Literal	enjoy	0	0.166667	0.37037	The pair sat out on their deck to enjoy the delicious meal.
Mental	2b	Low	enjoy	0.142857	0.125	0.111111	Meanwhile, the industry has enjoyed several profitable years.
Mental	2c	High	enjoy	0.285714	0.0588235	0.481481	Architectural salvage dates to the late 19th century, a time when cast-iron building ornamentation enjoyed great popularity.
Mental	3a	Literal	imagine	0.166667	0.1	0.0714286	He imagines an old farmer driving his pickup out in the afternoon to fling balding tires into the ravine.
Mental	3b	Low	imagine	0.6875	0	0.357143	Shaw's comedy imagines a rousing debate of ideas between notable figures of the late 17th century.
Mental	3c	High	imagine	0.888889	0.235294	0.571429	A truncated notion of subjectivity imagines subjects all closed up within themselves.
Mental	4a	Literal	offend	0.230769	0	0.263158	Equally likely, maybe they will do or say something to offend the person with the disability.
Mental	4b	Low	offend	0.818182	0.454545	0.631579	Advertising will almost surely offend some extremist positions, so marketers will have to have thicker skins.
Mental	4c	High	offend	0.357143	0	0.105263	The Brown decision says that racial classifications offend the Constitution only when they create feelings of inferiority.
Mental	5a	Literal	see	0.294118	0.0909091	0.461538	He saw in the faint moonlight a figure kneeling on the floor before the desk.
Mental	5b	Low	see	0	0	0.153846	The 1970 regular season, the first post-merger season, saw the Patriots relocate to historic Harvard Stadium.
Mental	5c	High	see	0.0769231	0	0.384615	The percentage of new homes completed in the United States saw a slight uptick recently after decades of decline.
Physical	1a	Literal	butcher	0	0	0.05	Today the area's animals are getting butchered for much-needed meat.
Physical	1b	Low	butcher	0.8	0.5625	0.65	If we butcher a weaker opponent for no good cause, then our battle against the enemy becomes tainted.
Physical	1c	High	butcher	0.846154	0.571429	0.3	I've seen the details butchered more than once in other accounts, so that was a nice change
Physical	2a	Literal	detach	0.153846	0	0	The bacteria will detach from the surface of a cell at the slightest joggle.
Physical	2b	Low	detach	1	0.777778	0.941176	A man sits bowed down by guilt, as if he can't quite detach himself from the earth's crust.
Physical	2c	High	detach	0.2	0	0.0588235	Single-payer health care models detach employment or health status from coverage and premium amount
Physical	3a	Literal	jump	0.0909091	0	0.214286	The father arrives in his blue uniform, and both boys jump up to salute him.
Physical	3b	Low	jump	0.214286	0	0.285714	In yesterday's auction, interest rates on short-term Treasury securities jumped to the highest level since January.
Physical	3c	High	jump	0.615385	0.333333	0.5	Since most couples live together first, you don't have a whole new life to jump into, Greer points out.
Physical	4a	Literal	migrate	0	0.0833333	0.241379	I know the swans from up north migrate to Lake Matamuskeet every winter, but I guess they came here this time.
Physical	4b	Low	migrate	0.736842	0.416667	0.482759	In this difficult economy, people migrate to value, and Walmart stands for value.
Physical	4c	High	migrate	0.0666667	0.125	0.275862	Democrats warn that once the new precedent is set, it can easily migrate to other nominations and even legislation.
Physical	5a	Literal	throw	0.333333	0.214286	0.411765	Well, then we will throw the money out of the moving car.
Physical	5b	Low	throw	0.705882	0.214286	0.294118	The plan doesn't simply throw a lot of new money around or create a lot of new bureaucracy.
Physical	5c	High	throw	0.5	0	0.294118	Few asked about my hip, and no one thought to throw any casual encouragement my way.
Social	1a	Literal	buy	0.142857	0	0.133333	People buy lottery tickets everyday. It's a habit.
Social	1b	Low	buy	0.4375	0.4	0.733333	It's a desperate gamble to buy us time to refit and retrain.
Social	1c	High	buy	0.625	0.333333	0.133333	What exactly does this sassiness buy him? More national media publicity in the last four years than other representatives.
Social	2a	Literal	marry	0.153846	0	0.15	I'd been wanting to ask Sara to marry me for more than a year, but I kept putting it off.
Social	2b	Low	marry	0.8125	0.65	0.15	The showpiece is a pricey MacBook Pro that basically marries the ultrathin MacBook Air with the sharpness of the iPad.
Social	2c	High	marry	1	0.636364	0.7	In order to divorce, you have to be married. We never married the Soviet Union. We were raped during the 50 years.
Social	3a	Literal	neglect	0.133333	0	0.0909091	The plan may not be enough to make an impact on real criminals, such as wife-beaters or those who neglect their children.
Social	3b	Low	neglect	0	0	0.227273	The story neglected to include senior judges and department heads among the 43 retirees who have returned to work.
Social	3c	High	neglect	0.4	0.0769231	0.636364	Both theoretical viewpoints seem to neglect the ambivalent state of Zulu political transformations.
Social	4a	Literal	obey	0.142857	0	0.130435	All societies have rules or laws and require their members to obey them for the peace and good order of that society.
Social	4b	Low	obey	0.142857	0.153846	0.0869565	After all, a baseball must obey the laws of physics, and there was a well-established theory and sufficient data available.
Social	4c	High	obey	1	0.769231	0.782609	Tomorrow obeys a futurist the way lightning obeys a weatherman.
Social	5a	Literal	punish	0.0625	0.1	0.05	How should we punish these children - according to their age or their crime?
Social	5b	Low	punish	0	0.0769231	0.2	Put simply, criminal law punishes the defendant because of what he has done in the past.
Social	5c	High	punish	0.785714	0.666667	0.7	That was a remark for which her sleek body would punish me all night long.
