# Supplementary material
Source: ML conference proceedings conference paper supplement (https://aclanthology.org/P14-2121)
Supplement: Datasets [file VU Amsterdam Metaphor Corpus.Scalar Ratings and Predictions.xlsx]

## Sheet: VU Amsterdam Metaphor Corpus.Fe
ID		GENRE	CLASS	PREDICTION	SCALAR
3507		ACADEMIC	LITERAL	LITERAL	0.477893
2789		ACADEMIC	LITERAL	LITERAL	0.477686
3643		ACADEMIC	LITERAL	LITERAL	0.476961
2776		ACADEMIC	LITERAL	LITERAL	0.476562
1155		ACADEMIC	LITERAL	LITERAL	0.476038
3423		ACADEMIC	LITERAL	LITERAL	0.475826
3763		ACADEMIC	LITERAL	LITERAL	0.475694
2778		ACADEMIC	LITERAL	LITERAL	0.475694
3707		ACADEMIC	LITERAL	LITERAL	0.475692
2746		ACADEMIC	LITERAL	LITERAL	0.475391
3345		ACADEMIC	LITERAL	LITERAL	0.475333
3522		ACADEMIC	LITERAL	LITERAL	0.47525
3148		ACADEMIC	LITERAL	LITERAL	0.475
5283		ACADEMIC	LITERAL	LITERAL	0.475
3282		ACADEMIC	LITERAL	LITERAL	0.475
3518		ACADEMIC	LITERAL	LITERAL	0.475
5284		ACADEMIC	LITERAL	LITERAL	0.475
3270		ACADEMIC	LITERAL	LITERAL	0.475
5119		ACADEMIC	LITERAL	LITERAL	0.475
3450		ACADEMIC	LITERAL	LITERAL	0.475
3662		ACADEMIC	LITERAL	LITERAL	0.473667
3287		ACADEMIC	LITERAL	LITERAL	0.473469
3570		ACADEMIC	LITERAL	LITERAL	0.473333
3650		ACADEMIC	LITERAL	LITERAL	0.473225
3451		ACADEMIC	LITERAL	LITERAL	0.471408
3147		ACADEMIC	LITERAL	LITERAL	0.471
5672		ACADEMIC	LITERAL	LITERAL	0.470313
5106		ACADEMIC	LITERAL	LITERAL	0.470238
5084		ACADEMIC	LITERAL	LITERAL	0.470132
5292		ACADEMIC	LITERAL	LITERAL	0.47
3631		ACADEMIC	LITERAL	LITERAL	0.469444
5312		ACADEMIC	LITERAL	LITERAL	0.469141
2824		ACADEMIC	LITERAL	LITERAL	0.468778
3438		ACADEMIC	LITERAL	LITERAL	0.46875
5324		ACADEMIC	LITERAL	LITERAL	0.46875
1125		ACADEMIC	LITERAL	LITERAL	0.468112
3622		ACADEMIC	LITERAL	LITERAL	0.467111
3355		ACADEMIC	LITERAL	LITERAL	0.466667
3191		ACADEMIC	LITERAL	LITERAL	0.466667
5074		ACADEMIC	LITERAL	LITERAL	0.466667
3466		ACADEMIC	LITERAL	LITERAL	0.466667
3508		ACADEMIC	LITERAL	LITERAL	0.466667
3299		ACADEMIC	LITERAL	LITERAL	0.466529
3269		ACADEMIC	LITERAL	LITERAL	0.465959
3329		ACADEMIC	LITERAL	LITERAL	0.465476
3115		ACADEMIC	LITERAL	LITERAL	0.464751
3419		ACADEMIC	LITERAL	LITERAL	0.464706
3141		ACADEMIC	LITERAL	LITERAL	0.464706
2136		ACADEMIC	LITERAL	LITERAL	0.464222
1122		ACADEMIC	LITERAL	LITERAL	0.464062
2745		ACADEMIC	LITERAL	LITERAL	0.464062
3510		ACADEMIC	LITERAL	LITERAL	0.463581
3557		ACADEMIC	LITERAL	LITERAL	0.463235
3636		ACADEMIC	LITERAL	LITERAL	0.462891
3193		ACADEMIC	LITERAL	LITERAL	0.462891
3351		ACADEMIC	LITERAL	LITERAL	0.462722
3669		ACADEMIC	LITERAL	LITERAL	0.4625
1188		ACADEMIC	LITERAL	LITERAL	0.462245
3272		ACADEMIC	LITERAL	LITERAL	0.461224
3264		ACADEMIC	LITERAL	LITERAL	0.461111
3159		ACADEMIC	LITERAL	LITERAL	0.460714
3583		ACADEMIC	LITERAL	LITERAL	0.460714
3037		ACADEMIC	LITERAL	LITERAL	0.460714
3182		ACADEMIC	LITERAL	LITERAL	0.459615
3524		ACADEMIC	LITERAL	LITERAL	0.458471
3197		ACADEMIC	LITERAL	LITERAL	0.458333
5394		ACADEMIC	LITERAL	LITERAL	0.458224
3394		ACADEMIC	LITERAL	LITERAL	0.457353
3528		ACADEMIC	LITERAL	LITERAL	0.457031
3574		ACADEMIC	LITERAL	LITERAL	0.45679
3079		ACADEMIC	LITERAL	LITERAL	0.45625
3552		ACADEMIC	LITERAL	LITERAL	0.45625
3593		ACADEMIC	LITERAL	LITERAL	0.456228
3190		ACADEMIC	LITERAL	LITERAL	0.456228
6152		ACADEMIC	LITERAL	LITERAL	0.455889
3199		ACADEMIC	LITERAL	LITERAL	0.455556
3290		ACADEMIC	LITERAL	LITERAL	0.455111
3241		ACADEMIC	LITERAL	LITERAL	0.455063
2237		ACADEMIC	LITERAL	LITERAL	0.45503
3500		ACADEMIC	LITERAL	LITERAL	0.455
3620		ACADEMIC	LITERAL	LITERAL	0.454592
3632		ACADEMIC	LITERAL	LITERAL	0.454012
3268		ACADEMIC	LITERAL	LITERAL	0.453571
3023		ACADEMIC	LITERAL	LITERAL	0.45345
3307		ACADEMIC	LITERAL	LITERAL	0.452941
3477		ACADEMIC	LITERAL	LITERAL	0.452778
3118		ACADEMIC	LITERAL	LITERAL	0.452163
3667		ACADEMIC	LITERAL	LITERAL	0.451923
3554		ACADEMIC	LITERAL	LITERAL	0.451817
3121		ACADEMIC	LITERAL	LITERAL	0.451562
3634		ACADEMIC	LITERAL	LITERAL	0.450391
3319		ACADEMIC	LITERAL	LITERAL	0.450391
3194		ACADEMIC	LITERAL	LITERAL	0.450391
3612		ACADEMIC	LITERAL	LITERAL	0.45
3404		ACADEMIC	LITERAL	LITERAL	0.449074
3647		ACADEMIC	LITERAL	LITERAL	0.44896
3198		ACADEMIC	LITERAL	LITERAL	0.448554
3514		ACADEMIC	LITERAL	LITERAL	0.448443
6125		ACADEMIC	LITERAL	LITERAL	0.448199
2718		ACADEMIC	LITERAL	LITERAL	0.448097
3426		ACADEMIC	LITERAL	LITERAL	0.448
3291		ACADEMIC	LITERAL	LITERAL	0.44784
5410		ACADEMIC	LITERAL	LITERAL	0.447751
3546		ACADEMIC	LITERAL	LITERAL	0.447414
3484		ACADEMIC	LITERAL	LITERAL	0.445508
3520		ACADEMIC	LITERAL	LITERAL	0.445
2930		ACADEMIC	LITERAL	LITERAL	0.444806
3120		ACADEMIC	LITERAL	LITERAL	0.444737
3285		ACADEMIC	LITERAL	LITERAL	0.444531
1104		ACADEMIC	LITERAL	LITERAL	0.444444
3623		ACADEMIC	LITERAL	LITERAL	0.444444
3657		ACADEMIC	LITERAL	LITERAL	0.443975
3571		ACADEMIC	LITERAL	LITERAL	0.44375
3175		ACADEMIC	LITERAL	LITERAL	0.443182
3460		ACADEMIC	LITERAL	LITERAL	0.443112
3565		ACADEMIC	LITERAL	LITERAL	0.442899
3109		ACADEMIC	LITERAL	LITERAL	0.4428
3542		ACADEMIC	LITERAL	LITERAL	0.442361
2235		ACADEMIC	LITERAL	LITERAL	0.442361
3308		ACADEMIC	LITERAL	LITERAL	0.441667
3652		ACADEMIC	LITERAL	LITERAL	0.441667
3223		ACADEMIC	LITERAL	LITERAL	0.441667
5065		ACADEMIC	LITERAL	LITERAL	0.441667
1154		ACADEMIC	LITERAL	LITERAL	0.440909
3567		ACADEMIC	LITERAL	LITERAL	0.440052
3222		ACADEMIC	LITERAL	LITERAL	0.43932
3526		ACADEMIC	LITERAL	LITERAL	0.439053
2672		ACADEMIC	LITERAL	LITERAL	0.438889
3239		ACADEMIC	LITERAL	LITERAL	0.437891
1113		ACADEMIC	LITERAL	LITERAL	0.4375
3653		ACADEMIC	LITERAL	LITERAL	0.4375
2123		ACADEMIC	LITERAL	LITERAL	0.436364
3256		ACADEMIC	LITERAL	LITERAL	0.436364
2933		ACADEMIC	LITERAL	LITERAL	0.434862
3296		ACADEMIC	LITERAL	LITERAL	0.434862
3544		ACADEMIC	LITERAL	LITERAL	0.434516
3284		ACADEMIC	LITERAL	LITERAL	0.434516
3589		ACADEMIC	LITERAL	LITERAL	0.43417
3616		ACADEMIC	LITERAL	LITERAL	0.433824
5545		ACADEMIC	LITERAL	LITERAL	0.433673
3334		ACADEMIC	LITERAL	LITERAL	0.433333
3532		ACADEMIC	LITERAL	LITERAL	0.433333
3265		ACADEMIC	LITERAL	LITERAL	0.433333
3578		ACADEMIC	LITERAL	LITERAL	0.433045
3656		ACADEMIC	LITERAL	LITERAL	0.432143
3606		ACADEMIC	LITERAL	LITERAL	0.431641
3577		ACADEMIC	LITERAL	LITERAL	0.431641
3129		ACADEMIC	LITERAL	LITERAL	0.43148
1181		ACADEMIC	LITERAL	LITERAL	0.430556
3389		ACADEMIC	LITERAL	LITERAL	0.43
3547		ACADEMIC	LITERAL	LITERAL	0.429592
5114		ACADEMIC	LITERAL	LITERAL	0.429592
3551		ACADEMIC	LITERAL	LITERAL	0.42832
5124		ACADEMIC	LITERAL	LITERAL	0.427941
5113		ACADEMIC	LITERAL	LITERAL	0.427778
5625		ACADEMIC	LITERAL	LITERAL	0.426989
3615		ACADEMIC	LITERAL	LITERAL	0.426817
3361		ACADEMIC	LITERAL	LITERAL	0.426
3204		ACADEMIC	LITERAL	LITERAL	0.425
3320		ACADEMIC	LITERAL	LITERAL	0.425
3387		ACADEMIC	LITERAL	LITERAL	0.425
3230		ACADEMIC	LITERAL	LITERAL	0.425
5577		ACADEMIC	LITERAL	LITERAL	0.42133
3486		ACADEMIC	LITERAL	LITERAL	0.420679
3383		ACADEMIC	LITERAL	LITERAL	0.42064
3600		ACADEMIC	LITERAL	LITERAL	0.420414
3509		ACADEMIC	LITERAL	LITERAL	0.42025
3335		ACADEMIC	LITERAL	LITERAL	0.419898
3491		ACADEMIC	LITERAL	LITERAL	0.419898
3604		ACADEMIC	LITERAL	LITERAL	0.419444
3666		ACADEMIC	LITERAL	LITERAL	0.419444
2688		ACADEMIC	LITERAL	LITERAL	0.418229
3505		ACADEMIC	LITERAL	LITERAL	0.416667
3471		ACADEMIC	LITERAL	LITERAL	0.416667
5323		ACADEMIC	LITERAL	LITERAL	0.415385
3321		ACADEMIC	LITERAL	LITERAL	0.414706
3343		ACADEMIC	LITERAL	LITERAL	0.414
3183		ACADEMIC	LITERAL	LITERAL	0.413636
3648		ACADEMIC	LITERAL	LITERAL	0.4125
1151		ACADEMIC	LITERAL	LITERAL	0.4125
3243		ACADEMIC	LITERAL	LITERAL	0.411983
3624		ACADEMIC	LITERAL	LITERAL	0.411224
3301		ACADEMIC	LITERAL	LITERAL	0.411059
3661		ACADEMIC	LITERAL	LITERAL	0.411
3231		ACADEMIC	LITERAL	LITERAL	0.41025
3663		ACADEMIC	LITERAL	LITERAL	0.410059
2710		ACADEMIC	LITERAL	LITERAL	0.41
3418		ACADEMIC	LITERAL	LITERAL	0.41
3189		ACADEMIC	LITERAL	LITERAL	0.409568
3654		ACADEMIC	LITERAL	LITERAL	0.408333
3490		ACADEMIC	LITERAL	LITERAL	0.408284
3515		ACADEMIC	LITERAL	LITERAL	0.406574
3635		ACADEMIC	LITERAL	LITERAL	0.40625
3621		ACADEMIC	LITERAL	LITERAL	0.405882
3196		ACADEMIC	LITERAL	LITERAL	0.405579
3253		ACADEMIC	LITERAL	LITERAL	0.404592
3610		ACADEMIC	LITERAL	LITERAL	0.403099
3566		ACADEMIC	LITERAL	LITERAL	0.402608
3535		ACADEMIC	LITERAL	LITERAL	0.402608
3376		ACADEMIC	LITERAL	LITERAL	0.401667
3305		ACADEMIC	LITERAL	LITERAL	0.401653
3427		ACADEMIC	LITERAL	LITERAL	0.401562
2176		ACADEMIC	LITERAL	LITERAL	0.398554
3298		ACADEMIC	LITERAL	LITERAL	0.398529
3164		ACADEMIC	LITERAL	LITERAL	0.397059
3250		ACADEMIC	LITERAL	LITERAL	0.397059
5305		ACADEMIC	LITERAL	LITERAL	0.395833
3449		ACADEMIC	LITERAL	LITERAL	0.394922
3613		ACADEMIC	LITERAL	LITERAL	0.394922
3586		ACADEMIC	LITERAL	LITERAL	0.394898
3173		ACADEMIC	LITERAL	LITERAL	0.39375
3151		ACADEMIC	LITERAL	LITERAL	0.392958
3580		ACADEMIC	LITERAL	LITERAL	0.391667
2644		ACADEMIC	LITERAL	LITERAL	0.390667
3458		ACADEMIC	LITERAL	LITERAL	0.388462
3588		ACADEMIC	LITERAL	LITERAL	0.387457
3306		ACADEMIC	LITERAL	LITERAL	0.384467
3585		ACADEMIC	LITERAL	LITERAL	0.382692
3637		ACADEMIC	LITERAL	LITERAL	0.382612
2793		ACADEMIC	LITERAL	LITERAL	0.382422
2798		ACADEMIC	LITERAL	LITERAL	0.381953
3235		ACADEMIC	LITERAL	LITERAL	0.381667
3651		ACADEMIC	LITERAL	LITERAL	0.381667
3417		ACADEMIC	LITERAL	LITERAL	0.381657
3475		ACADEMIC	LITERAL	LITERAL	0.380444
3380		ACADEMIC	LITERAL	LITERAL	0.379167
3371		ACADEMIC	LITERAL	LITERAL	0.378778
2113		ACADEMIC	LITERAL	LITERAL	0.377515
3581		ACADEMIC	LITERAL	LITERAL	0.377273
3215		ACADEMIC	LITERAL	LITERAL	0.376775
1133		ACADEMIC	LITERAL	LITERAL	0.375
2769		ACADEMIC	LITERAL	LITERAL	0.375
5510		ACADEMIC	LITERAL	LITERAL	0.369444
5082		ACADEMIC	LITERAL	LITERAL	0.369118
3124		ACADEMIC	LITERAL	LITERAL	0.369083
2790		ACADEMIC	LITERAL	LITERAL	0.36875
3641		ACADEMIC	LITERAL	LITERAL	0.366667
3568		ACADEMIC	LITERAL	LITERAL	0.361224
3573		ACADEMIC	LITERAL	LITERAL	0.359722
3131		ACADEMIC	LITERAL	LITERAL	0.354012
3425		ACADEMIC	LITERAL	LITERAL	0.353125
3569		ACADEMIC	LITERAL	LITERAL	0.353
5656		ACADEMIC	LITERAL	LITERAL	0.352778
3582		ACADEMIC	LITERAL	LITERAL	0.351562
1121		ACADEMIC	LITERAL	LITERAL	0.351235
3592		ACADEMIC	LITERAL	LITERAL	0.35
5038		ACADEMIC	LITERAL	LITERAL	0.345934
3533		ACADEMIC	LITERAL	LITERAL	0.344444
5758		ACADEMIC	LITERAL	LITERAL	0.344118
3563		ACADEMIC	LITERAL	LITERAL	0.342647
5177		ACADEMIC	LITERAL	LITERAL	0.342593
2667		ACADEMIC	LITERAL	LITERAL	0.341358
3170		ACADEMIC	LITERAL	LITERAL	0.341358
3179		ACADEMIC	LITERAL	LITERAL	0.340667
3400		ACADEMIC	LITERAL	LITERAL	0.338333
3564		ACADEMIC	LITERAL	LITERAL	0.331818
5573		ACADEMIC	LITERAL	LITERAL	0.319444
2175		ACADEMIC	LITERAL	LITERAL	0.317284
5384		ACADEMIC	LITERAL	LITERAL	0.316667
3318		ACADEMIC	LITERAL	LITERAL	0.311
5608		ACADEMIC	LITERAL	LITERAL	0.3
3273		ACADEMIC	LITERAL	LITERAL	0.285667
3186		ACADEMIC	LITERAL	LITERAL	0.283333
3633		ACADEMIC	LITERAL	LITERAL	0.27585
3506		ACADEMIC	LITERAL	LITERAL	0.275
3232		ACADEMIC	LITERAL	LITERAL	0.268229
3156		ACADEMIC	LITERAL	LITERAL	0.266667
3212		ACADEMIC	LITERAL	LITERAL	0.266667
3237		ACADEMIC	LITERAL	LITERAL	0.25
3628		ACADEMIC	LITERAL	LITERAL	0.191667
3244		ACADEMIC	LITERAL	LITERAL	0.166667
3262		ACADEMIC	LITERAL	LITERAL	0.116667
3369		ACADEMIC	LITERAL	METAPHOR	0.655
3353		ACADEMIC	LITERAL	METAPHOR	0.637891
3278		ACADEMIC	LITERAL	METAPHOR	0.633333
3517		ACADEMIC	LITERAL	METAPHOR	0.625
3234		ACADEMIC	LITERAL	METAPHOR	0.625
5294		ACADEMIC	LITERAL	METAPHOR	0.62
3294		ACADEMIC	LITERAL	METAPHOR	0.61875
3467		ACADEMIC	LITERAL	METAPHOR	0.618182
3260		ACADEMIC	LITERAL	METAPHOR	0.617857
3155		ACADEMIC	LITERAL	METAPHOR	0.611765
3266		ACADEMIC	LITERAL	METAPHOR	0.610294
3283		ACADEMIC	LITERAL	METAPHOR	0.61
4991		ACADEMIC	LITERAL	METAPHOR	0.609615
3527		ACADEMIC	LITERAL	METAPHOR	0.608333
3562		ACADEMIC	LITERAL	METAPHOR	0.606818
3293		ACADEMIC	LITERAL	METAPHOR	0.60625
3295		ACADEMIC	LITERAL	METAPHOR	0.60625
3462		ACADEMIC	LITERAL	METAPHOR	0.605
3597		ACADEMIC	LITERAL	METAPHOR	0.604348
3626		ACADEMIC	LITERAL	METAPHOR	0.604224
3280		ACADEMIC	LITERAL	METAPHOR	0.604167
5705		ACADEMIC	LITERAL	METAPHOR	0.601817
3659		ACADEMIC	LITERAL	METAPHOR	0.600694
3154		ACADEMIC	LITERAL	METAPHOR	0.60051
5066		ACADEMIC	LITERAL	METAPHOR	0.600444
3228		ACADEMIC	LITERAL	METAPHOR	0.6
3221		ACADEMIC	LITERAL	METAPHOR	0.6
3279		ACADEMIC	LITERAL	METAPHOR	0.6
3367		ACADEMIC	LITERAL	METAPHOR	0.6
3396		ACADEMIC	LITERAL	METAPHOR	0.6
3145		ACADEMIC	LITERAL	METAPHOR	0.6
3185		ACADEMIC	LITERAL	METAPHOR	0.6
3525		ACADEMIC	LITERAL	METAPHOR	0.598554
3202		ACADEMIC	LITERAL	METAPHOR	0.59737
3614		ACADEMIC	LITERAL	METAPHOR	0.595833
3314		ACADEMIC	LITERAL	METAPHOR	0.595062
3137		ACADEMIC	LITERAL	METAPHOR	0.594753
3397		ACADEMIC	LITERAL	METAPHOR	0.59375
3406		ACADEMIC	LITERAL	METAPHOR	0.593491
3252		ACADEMIC	LITERAL	METAPHOR	0.59273
3413		ACADEMIC	LITERAL	METAPHOR	0.592556
5536		ACADEMIC	LITERAL	METAPHOR	0.592308
5659		ACADEMIC	LITERAL	METAPHOR	0.591667
2178		ACADEMIC	LITERAL	METAPHOR	0.591667
3206		ACADEMIC	LITERAL	METAPHOR	0.591667
3325		ACADEMIC	LITERAL	METAPHOR	0.591343
3556		ACADEMIC	LITERAL	METAPHOR	0.590909
2773		ACADEMIC	LITERAL	METAPHOR	0.59
2806		ACADEMIC	LITERAL	METAPHOR	0.589965
3108		ACADEMIC	LITERAL	METAPHOR	0.589706
3354		ACADEMIC	LITERAL	METAPHOR	0.589706
3441		ACADEMIC	LITERAL	METAPHOR	0.588889
3143		ACADEMIC	LITERAL	METAPHOR	0.588158
3362		ACADEMIC	LITERAL	METAPHOR	0.587891
3444		ACADEMIC	LITERAL	METAPHOR	0.587132
3350		ACADEMIC	LITERAL	METAPHOR	0.586224
3642		ACADEMIC	LITERAL	METAPHOR	0.585941
2970		ACADEMIC	LITERAL	METAPHOR	0.585714
5658		ACADEMIC	LITERAL	METAPHOR	0.585714
3453		ACADEMIC	LITERAL	METAPHOR	0.58525
5496		ACADEMIC	LITERAL	METAPHOR	0.585
3322		ACADEMIC	LITERAL	METAPHOR	0.584917
3116		ACADEMIC	LITERAL	METAPHOR	0.584765
3605		ACADEMIC	LITERAL	METAPHOR	0.584488
3594		ACADEMIC	LITERAL	METAPHOR	0.58417
3414		ACADEMIC	LITERAL	METAPHOR	0.584091
3142		ACADEMIC	LITERAL	METAPHOR	0.584028
5310		ACADEMIC	LITERAL	METAPHOR	0.583333
3545		ACADEMIC	LITERAL	METAPHOR	0.582353
3110		ACADEMIC	LITERAL	METAPHOR	0.581667
3548		ACADEMIC	LITERAL	METAPHOR	0.581641
3446		ACADEMIC	LITERAL	METAPHOR	0.58125
2951		ACADEMIC	LITERAL	METAPHOR	0.580889
3340		ACADEMIC	LITERAL	METAPHOR	0.58
3365		ACADEMIC	LITERAL	METAPHOR	0.579762
3347		ACADEMIC	LITERAL	METAPHOR	0.579762
3359		ACADEMIC	LITERAL	METAPHOR	0.579592
5611		ACADEMIC	LITERAL	METAPHOR	0.579438
3708		ACADEMIC	LITERAL	METAPHOR	0.578571
5648		ACADEMIC	LITERAL	METAPHOR	0.578571
1156		ACADEMIC	LITERAL	METAPHOR	0.578571
3286		ACADEMIC	LITERAL	METAPHOR	0.577778
3540		ACADEMIC	LITERAL	METAPHOR	0.576562
3561		ACADEMIC	LITERAL	METAPHOR	0.576562
3494		ACADEMIC	LITERAL	METAPHOR	0.576
3673		ACADEMIC	LITERAL	METAPHOR	0.575781
3390		ACADEMIC	LITERAL	METAPHOR	0.575391
3664		ACADEMIC	LITERAL	METAPHOR	0.575391
3559		ACADEMIC	LITERAL	METAPHOR	0.575346
3226		ACADEMIC	LITERAL	METAPHOR	0.575111
5353		ACADEMIC	LITERAL	METAPHOR	0.575
3324		ACADEMIC	LITERAL	METAPHOR	0.575
1161		ACADEMIC	LITERAL	METAPHOR	0.575
5026		ACADEMIC	LITERAL	METAPHOR	0.575
3463		ACADEMIC	LITERAL	METAPHOR	0.575
3553		ACADEMIC	LITERAL	METAPHOR	0.575
3603		ACADEMIC	LITERAL	METAPHOR	0.575
3317		ACADEMIC	LITERAL	METAPHOR	0.573778
3560		ACADEMIC	LITERAL	METAPHOR	0.571433
5005		ACADEMIC	LITERAL	METAPHOR	0.569231
3476		ACADEMIC	LITERAL	METAPHOR	0.569141
3171		ACADEMIC	LITERAL	METAPHOR	0.568975
3671		ACADEMIC	LITERAL	METAPHOR	0.56875
3432		ACADEMIC	LITERAL	METAPHOR	0.568698
5670		ACADEMIC	LITERAL	METAPHOR	0.567901
3655		ACADEMIC	LITERAL	METAPHOR	0.566667
3195		ACADEMIC	LITERAL	METAPHOR	0.566667
3360		ACADEMIC	LITERAL	METAPHOR	0.565909
3267		ACADEMIC	LITERAL	METAPHOR	0.565306
3530		ACADEMIC	LITERAL	METAPHOR	0.565
3456		ACADEMIC	LITERAL	METAPHOR	0.565
3122		ACADEMIC	LITERAL	METAPHOR	0.564796
3229		ACADEMIC	LITERAL	METAPHOR	0.563653
3658		ACADEMIC	LITERAL	METAPHOR	0.563636
3323		ACADEMIC	LITERAL	METAPHOR	0.563636
3429		ACADEMIC	LITERAL	METAPHOR	0.563581
3625		ACADEMIC	LITERAL	METAPHOR	0.563235
3646		ACADEMIC	LITERAL	METAPHOR	0.562891
3521		ACADEMIC	LITERAL	METAPHOR	0.5625
3214		ACADEMIC	LITERAL	METAPHOR	0.5625
5019		ACADEMIC	LITERAL	METAPHOR	0.562132
3541		ACADEMIC	LITERAL	METAPHOR	0.561678
3133		ACADEMIC	LITERAL	METAPHOR	0.561538
3538		ACADEMIC	LITERAL	METAPHOR	0.561364
3549		ACADEMIC	LITERAL	METAPHOR	0.561
3424		ACADEMIC	LITERAL	METAPHOR	0.561
5592		ACADEMIC	LITERAL	METAPHOR	0.560799
3169		ACADEMIC	LITERAL	METAPHOR	0.560714
5147		ACADEMIC	LITERAL	METAPHOR	0.560714
3338		ACADEMIC	LITERAL	METAPHOR	0.560294
3512		ACADEMIC	LITERAL	METAPHOR	0.560294
5055		ACADEMIC	LITERAL	METAPHOR	0.559766
2209		ACADEMIC	LITERAL	METAPHOR	0.559568
5313		ACADEMIC	LITERAL	METAPHOR	0.559184
3644		ACADEMIC	LITERAL	METAPHOR	0.55917
3249		ACADEMIC	LITERAL	METAPHOR	0.55917
3349		ACADEMIC	LITERAL	METAPHOR	0.559028
3377		ACADEMIC	LITERAL	METAPHOR	0.558824
3125		ACADEMIC	LITERAL	METAPHOR	0.558333
3608		ACADEMIC	LITERAL	METAPHOR	0.558333
3248		ACADEMIC	LITERAL	METAPHOR	0.557798
3630		ACADEMIC	LITERAL	METAPHOR	0.557699
3119		ACADEMIC	LITERAL	METAPHOR	0.557699
3392		ACADEMIC	LITERAL	METAPHOR	0.557653
3516		ACADEMIC	LITERAL	METAPHOR	0.557
3217		ACADEMIC	LITERAL	METAPHOR	0.556667
3289		ACADEMIC	LITERAL	METAPHOR	0.556667
3336		ACADEMIC	LITERAL	METAPHOR	0.55625
3180		ACADEMIC	LITERAL	METAPHOR	0.55625
3598		ACADEMIC	LITERAL	METAPHOR	0.556179
3344		ACADEMIC	LITERAL	METAPHOR	0.556
3629		ACADEMIC	LITERAL	METAPHOR	0.556
3596		ACADEMIC	LITERAL	METAPHOR	0.555864
3534		ACADEMIC	LITERAL	METAPHOR	0.555556
3112		ACADEMIC	LITERAL	METAPHOR	0.5555
3213		ACADEMIC	LITERAL	METAPHOR	0.55525
3411		ACADEMIC	LITERAL	METAPHOR	0.554667
3488		ACADEMIC	LITERAL	METAPHOR	0.554412
3513		ACADEMIC	LITERAL	METAPHOR	0.554082
3410		ACADEMIC	LITERAL	METAPHOR	0.554025
3257		ACADEMIC	LITERAL	METAPHOR	0.553846
3211		ACADEMIC	LITERAL	METAPHOR	0.553778
3330		ACADEMIC	LITERAL	METAPHOR	0.553633
5105		ACADEMIC	LITERAL	METAPHOR	0.553287
3025		ACADEMIC	LITERAL	METAPHOR	0.552909
3572		ACADEMIC	LITERAL	METAPHOR	0.552515
5152		ACADEMIC	LITERAL	METAPHOR	0.552515
3474		ACADEMIC	LITERAL	METAPHOR	0.552515
3379		ACADEMIC	LITERAL	METAPHOR	0.552381
2728		ACADEMIC	LITERAL	METAPHOR	0.551562
5657		ACADEMIC	LITERAL	METAPHOR	0.550694
6112		ACADEMIC	LITERAL	METAPHOR	0.55062
3391		ACADEMIC	LITERAL	METAPHOR	0.55051
1118		ACADEMIC	LITERAL	METAPHOR	0.550391
3219		ACADEMIC	LITERAL	METAPHOR	0.550391
3177		ACADEMIC	LITERAL	METAPHOR	0.550391
3531		ACADEMIC	LITERAL	METAPHOR	0.550309
3225		ACADEMIC	LITERAL	METAPHOR	0.55
3523		ACADEMIC	LITERAL	METAPHOR	0.55
3602		ACADEMIC	LITERAL	METAPHOR	0.55
3227		ACADEMIC	LITERAL	METAPHOR	0.55
3639		ACADEMIC	LITERAL	METAPHOR	0.55
3163		ACADEMIC	LITERAL	METAPHOR	0.55
3152		ACADEMIC	LITERAL	METAPHOR	0.55
3372		ACADEMIC	LITERAL	METAPHOR	0.55
3472		ACADEMIC	LITERAL	METAPHOR	0.55
3611		ACADEMIC	LITERAL	METAPHOR	0.55
5144		ACADEMIC	LITERAL	METAPHOR	0.55
3201		ACADEMIC	LITERAL	METAPHOR	0.54949
3139		ACADEMIC	LITERAL	METAPHOR	0.548875
3341		ACADEMIC	LITERAL	METAPHOR	0.548529
3138		ACADEMIC	LITERAL	METAPHOR	0.547751
3481		ACADEMIC	LITERAL	METAPHOR	0.547405
3501		ACADEMIC	LITERAL	METAPHOR	0.547368
2181		ACADEMIC	LITERAL	METAPHOR	0.546655
3216		ACADEMIC	LITERAL	METAPHOR	0.54633
3668		ACADEMIC	LITERAL	METAPHOR	0.545588
3207		ACADEMIC	LITERAL	METAPHOR	0.545455
5174		ACADEMIC	LITERAL	METAPHOR	0.545455
3503		ACADEMIC	LITERAL	METAPHOR	0.544444
3447		ACADEMIC	LITERAL	METAPHOR	0.544444
5003		ACADEMIC	LITERAL	METAPHOR	0.544444
1166		ACADEMIC	LITERAL	METAPHOR	0.54375
3127		ACADEMIC	LITERAL	METAPHOR	0.543519
3161		ACADEMIC	LITERAL	METAPHOR	0.543367
3238		ACADEMIC	LITERAL	METAPHOR	0.543311
3511		ACADEMIC	LITERAL	METAPHOR	0.543084
3587		ACADEMIC	LITERAL	METAPHOR	0.543056
3166		ACADEMIC	LITERAL	METAPHOR	0.542901
3327		ACADEMIC	LITERAL	METAPHOR	0.542659
3575		ACADEMIC	LITERAL	METAPHOR	0.541804
3487		ACADEMIC	LITERAL	METAPHOR	0.541667
3375		ACADEMIC	LITERAL	METAPHOR	0.541667
3378		ACADEMIC	LITERAL	METAPHOR	0.541667
3584		ACADEMIC	LITERAL	METAPHOR	0.541522
5123		ACADEMIC	LITERAL	METAPHOR	0.541522
2775		ACADEMIC	LITERAL	METAPHOR	0.540306
3134		ACADEMIC	LITERAL	METAPHOR	0.539815
5471		ACADEMIC	LITERAL	METAPHOR	0.539706
3259		ACADEMIC	LITERAL	METAPHOR	0.539394
3618		ACADEMIC	LITERAL	METAPHOR	0.539062
3465		ACADEMIC	LITERAL	METAPHOR	0.539062
3220		ACADEMIC	LITERAL	METAPHOR	0.539062
3176		ACADEMIC	LITERAL	METAPHOR	0.538889
3357		ACADEMIC	LITERAL	METAPHOR	0.538636
3297		ACADEMIC	LITERAL	METAPHOR	0.538462
2145		ACADEMIC	LITERAL	METAPHOR	0.538462
3407		ACADEMIC	LITERAL	METAPHOR	0.538158
3316		ACADEMIC	LITERAL	METAPHOR	0.537891
3332		ACADEMIC	LITERAL	METAPHOR	0.537674
3555		ACADEMIC	LITERAL	METAPHOR	0.5375
3263		ACADEMIC	LITERAL	METAPHOR	0.5375
3386		ACADEMIC	LITERAL	METAPHOR	0.5375
3496		ACADEMIC	LITERAL	METAPHOR	0.537119
3274		ACADEMIC	LITERAL	METAPHOR	0.537111
3203		ACADEMIC	LITERAL	METAPHOR	0.536538
5115		ACADEMIC	LITERAL	METAPHOR	0.536364
5597		ACADEMIC	LITERAL	METAPHOR	0.536111
5702		ACADEMIC	LITERAL	METAPHOR	0.536111
1176		ACADEMIC	LITERAL	METAPHOR	0.536
3401		ACADEMIC	LITERAL	METAPHOR	0.535842
3420		ACADEMIC	LITERAL	METAPHOR	0.535526
6154		ACADEMIC	LITERAL	METAPHOR	0.535294
3160		ACADEMIC	LITERAL	METAPHOR	0.534911
3439		ACADEMIC	LITERAL	METAPHOR	0.534722
3665		ACADEMIC	LITERAL	METAPHOR	0.534722
3209		ACADEMIC	LITERAL	METAPHOR	0.533824
2119		ACADEMIC	LITERAL	METAPHOR	0.533824
5404		ACADEMIC	LITERAL	METAPHOR	0.533333
3638		ACADEMIC	LITERAL	METAPHOR	0.533333
3599		ACADEMIC	LITERAL	METAPHOR	0.533333
5355		ACADEMIC	LITERAL	METAPHOR	0.532143
3251		ACADEMIC	LITERAL	METAPHOR	0.531648
3275		ACADEMIC	LITERAL	METAPHOR	0.531641
3140		ACADEMIC	LITERAL	METAPHOR	0.531641
3315		ACADEMIC	LITERAL	METAPHOR	0.531641
3482		ACADEMIC	LITERAL	METAPHOR	0.53125
3436		ACADEMIC	LITERAL	METAPHOR	0.53125
3539		ACADEMIC	LITERAL	METAPHOR	0.531213
3313		ACADEMIC	LITERAL	METAPHOR	0.53116
3537		ACADEMIC	LITERAL	METAPHOR	0.530882
3416		ACADEMIC	LITERAL	METAPHOR	0.530556
3061		ACADEMIC	LITERAL	METAPHOR	0.529758
3333		ACADEMIC	LITERAL	METAPHOR	0.529545
3373		ACADEMIC	LITERAL	METAPHOR	0.528924
3448		ACADEMIC	LITERAL	METAPHOR	0.528571
3464		ACADEMIC	LITERAL	METAPHOR	0.528099
2124		ACADEMIC	LITERAL	METAPHOR	0.527941
3493		ACADEMIC	LITERAL	METAPHOR	0.527667
3111		ACADEMIC	LITERAL	METAPHOR	0.527556
3302		ACADEMIC	LITERAL	METAPHOR	0.527381
3468		ACADEMIC	LITERAL	METAPHOR	0.527273
3255		ACADEMIC	LITERAL	METAPHOR	0.52602
3181		ACADEMIC	LITERAL	METAPHOR	0.525781
3576		ACADEMIC	LITERAL	METAPHOR	0.525765
5627		ACADEMIC	LITERAL	METAPHOR	0.525694
2819		ACADEMIC	LITERAL	METAPHOR	0.525391
3208		ACADEMIC	LITERAL	METAPHOR	0.525391
3431		ACADEMIC	LITERAL	METAPHOR	0.525077
3459		ACADEMIC	LITERAL	METAPHOR	0.525
3434		ACADEMIC	LITERAL	METAPHOR	0.525
3421		ACADEMIC	LITERAL	METAPHOR	0.525
3617		ACADEMIC	LITERAL	METAPHOR	0.525
5719		ACADEMIC	LITERAL	METAPHOR	0.525
3408		ACADEMIC	LITERAL	METAPHOR	0.525
5620		ACADEMIC	LITERAL	METAPHOR	0.525
2763		ACADEMIC	LITERAL	METAPHOR	0.523875
3368		ACADEMIC	LITERAL	METAPHOR	0.523875
5711		ACADEMIC	LITERAL	METAPHOR	0.52381
3590		ACADEMIC	LITERAL	METAPHOR	0.523529
3218		ACADEMIC	LITERAL	METAPHOR	0.522934
3245		ACADEMIC	LITERAL	METAPHOR	0.522619
3543		ACADEMIC	LITERAL	METAPHOR	0.521939
5523		ACADEMIC	LITERAL	METAPHOR	0.521667
3437		ACADEMIC	LITERAL	METAPHOR	0.521429
2817		ACADEMIC	LITERAL	METAPHOR	0.520889
5741		ACADEMIC	LITERAL	METAPHOR	0.5205
3352		ACADEMIC	LITERAL	METAPHOR	0.52048
5458		ACADEMIC	LITERAL	METAPHOR	0.520062
3271		ACADEMIC	LITERAL	METAPHOR	0.52
5619		ACADEMIC	LITERAL	METAPHOR	0.52
2770		ACADEMIC	LITERAL	METAPHOR	0.519753
3024		ACADEMIC	LITERAL	METAPHOR	0.519531
3236		ACADEMIC	LITERAL	METAPHOR	0.519531
3247		ACADEMIC	LITERAL	METAPHOR	0.519141
3303		ACADEMIC	LITERAL	METAPHOR	0.518339
3312		ACADEMIC	LITERAL	METAPHOR	0.518084
3442		ACADEMIC	LITERAL	METAPHOR	0.517647
3692		ACADEMIC	LITERAL	METAPHOR	0.517361
2818		ACADEMIC	LITERAL	METAPHOR	0.517284
3443		ACADEMIC	LITERAL	METAPHOR	0.517111
3242		ACADEMIC	LITERAL	METAPHOR	0.517105
3388		ACADEMIC	LITERAL	METAPHOR	0.51684
3645		ACADEMIC	LITERAL	METAPHOR	0.516667
5320		ACADEMIC	LITERAL	METAPHOR	0.516667
3261		ACADEMIC	LITERAL	METAPHOR	0.516667
3499		ACADEMIC	LITERAL	METAPHOR	0.516667
3485		ACADEMIC	LITERAL	METAPHOR	0.516667
5397		ACADEMIC	LITERAL	METAPHOR	0.51616
3187		ACADEMIC	LITERAL	METAPHOR	0.516116
3479		ACADEMIC	LITERAL	METAPHOR	0.515976
3681		ACADEMIC	LITERAL	METAPHOR	0.515859
3165		ACADEMIC	LITERAL	METAPHOR	0.515625
3172		ACADEMIC	LITERAL	METAPHOR	0.515444
3385		ACADEMIC	LITERAL	METAPHOR	0.515306
3483		ACADEMIC	LITERAL	METAPHOR	0.51525
3149		ACADEMIC	LITERAL	METAPHOR	0.515
3619		ACADEMIC	LITERAL	METAPHOR	0.515
5080		ACADEMIC	LITERAL	METAPHOR	0.514062
3184		ACADEMIC	LITERAL	METAPHOR	0.514062
3292		ACADEMIC	LITERAL	METAPHOR	0.514062
2802		ACADEMIC	LITERAL	METAPHOR	0.514062
3136		ACADEMIC	LITERAL	METAPHOR	0.513966
2125		ACADEMIC	LITERAL	METAPHOR	0.513889
3454		ACADEMIC	LITERAL	METAPHOR	0.513778
3015		ACADEMIC	LITERAL	METAPHOR	0.513281
3331		ACADEMIC	LITERAL	METAPHOR	0.513281
3210		ACADEMIC	LITERAL	METAPHOR	0.513235
3240		ACADEMIC	LITERAL	METAPHOR	0.513017
3609		ACADEMIC	LITERAL	METAPHOR	0.512891
3395		ACADEMIC	LITERAL	METAPHOR	0.512891
2768		ACADEMIC	LITERAL	METAPHOR	0.512891
3758		ACADEMIC	LITERAL	METAPHOR	0.512674
3461		ACADEMIC	LITERAL	METAPHOR	0.5125
3382		ACADEMIC	LITERAL	METAPHOR	0.5125
3492		ACADEMIC	LITERAL	METAPHOR	0.512346
3200		ACADEMIC	LITERAL	METAPHOR	0.51157
2799		ACADEMIC	LITERAL	METAPHOR	0.511224
5612		ACADEMIC	LITERAL	METAPHOR	0.510807
3277		ACADEMIC	LITERAL	METAPHOR	0.510431
3469		ACADEMIC	LITERAL	METAPHOR	0.510294
3107		ACADEMIC	LITERAL	METAPHOR	0.510204
3649		ACADEMIC	LITERAL	METAPHOR	0.51
5225		ACADEMIC	LITERAL	METAPHOR	0.509722
3300		ACADEMIC	LITERAL	METAPHOR	0.509568
3246		ACADEMIC	LITERAL	METAPHOR	0.509524
2165		ACADEMIC	LITERAL	METAPHOR	0.509091
5533		ACADEMIC	LITERAL	METAPHOR	0.509091
5622		ACADEMIC	LITERAL	METAPHOR	0.509091
3601		ACADEMIC	LITERAL	METAPHOR	0.509028
3381		ACADEMIC	LITERAL	METAPHOR	0.508673
3519		ACADEMIC	LITERAL	METAPHOR	0.508333
3536		ACADEMIC	LITERAL	METAPHOR	0.508333
3489		ACADEMIC	LITERAL	METAPHOR	0.508333
3126		ACADEMIC	LITERAL	METAPHOR	0.508333
3276		ACADEMIC	LITERAL	METAPHOR	0.507653
3162		ACADEMIC	LITERAL	METAPHOR	0.507556
3363		ACADEMIC	LITERAL	METAPHOR	0.507031
5068		ACADEMIC	LITERAL	METAPHOR	0.50692
3337		ACADEMIC	LITERAL	METAPHOR	0.506818
3310		ACADEMIC	LITERAL	METAPHOR	0.506667
2868		ACADEMIC	LITERAL	METAPHOR	0.506641
3123		ACADEMIC	LITERAL	METAPHOR	0.506574
3412		ACADEMIC	LITERAL	METAPHOR	0.50625
3117		ACADEMIC	LITERAL	METAPHOR	0.50625
2762		ACADEMIC	LITERAL	METAPHOR	0.50625
5624		ACADEMIC	LITERAL	METAPHOR	0.506228
5614		ACADEMIC	LITERAL	METAPHOR	0.505882
3428		ACADEMIC	LITERAL	METAPHOR	0.505769
5203		ACADEMIC	LITERAL	METAPHOR	0.504752
2834		ACADEMIC	LITERAL	METAPHOR	0.504412
5668		ACADEMIC	LITERAL	METAPHOR	0.503846
3670		ACADEMIC	LITERAL	METAPHOR	0.503125
3326		ACADEMIC	LITERAL	METAPHOR	0.502778
5550		ACADEMIC	LITERAL	METAPHOR	0.501923
3627		ACADEMIC	LITERAL	METAPHOR	0.501667
3399		ACADEMIC	LITERAL	METAPHOR	0.501667
3004		ACADEMIC	LITERAL	METAPHOR	0.501183
3158		ACADEMIC	LITERAL	METAPHOR	0.501172
3135		ACADEMIC	LITERAL	METAPHOR	0.501038
5110		ACADEMIC	LITERAL	METAPHOR	0.500826
3660		ACADEMIC	LITERAL	METAPHOR	0.500781
3470		ACADEMIC	LITERAL	METAPHOR	0.500781
3579		ACADEMIC	LITERAL	METAPHOR	0.500617
3497		ACADEMIC	LITERAL	METAPHOR	0.500617
3132		ACADEMIC	LITERAL	METAPHOR	0.500592
3311		ACADEMIC	LITERAL	METAPHOR	0.500567
3366		ACADEMIC	LITERAL	METAPHOR	0.500391
3393		ACADEMIC	LITERAL	METAPHOR	0.500277
3178		ACADEMIC	LITERAL	METAPHOR	0.500207
3435		ACADEMIC	LITERAL	METAPHOR	0.50016
3288		ACADEMIC	LITERAL	METAPHOR	0.5
3409		ACADEMIC	LITERAL	METAPHOR	0.5
2164		ACADEMIC	LITERAL	METAPHOR	0.5
5435		ACADEMIC	LITERAL	METAPHOR	0.5
3374		ACADEMIC	LITERAL	METAPHOR	0.5
3498		ACADEMIC	LITERAL	METAPHOR	0.5
3346		ACADEMIC	LITERAL	METAPHOR	0.5
5182		ACADEMIC	LITERAL	METAPHOR	0.5
5492		ACADEMIC	LITERAL	METAPHOR	0.5
3457		ACADEMIC	LITERAL	METAPHOR	0.5
3473		ACADEMIC	LITERAL	METAPHOR	0.49948
5462		ACADEMIC	LITERAL	METAPHOR	0.498875
2807		ACADEMIC	LITERAL	METAPHOR	0.498875
3504		ACADEMIC	LITERAL	METAPHOR	0.49784
3591		ACADEMIC	LITERAL	METAPHOR	0.497405
3370		ACADEMIC	LITERAL	METAPHOR	0.497222
5366		ACADEMIC	LITERAL	METAPHOR	0.497222
3113		ACADEMIC	LITERAL	METAPHOR	0.497222
3358		ACADEMIC	LITERAL	METAPHOR	0.496939
5297		ACADEMIC	LITERAL	METAPHOR	0.496939
2771		ACADEMIC	LITERAL	METAPHOR	0.496429
5304		ACADEMIC	LITERAL	METAPHOR	0.496181
3480		ACADEMIC	LITERAL	METAPHOR	0.495889
3384		ACADEMIC	LITERAL	METAPHOR	0.495841
3233		ACADEMIC	LITERAL	METAPHOR	0.495014
3430		ACADEMIC	LITERAL	METAPHOR	0.495
3452		ACADEMIC	LITERAL	METAPHOR	0.49481
5264		ACADEMIC	LITERAL	METAPHOR	0.494444
5122		ACADEMIC	LITERAL	METAPHOR	0.494222
3433		ACADEMIC	LITERAL	METAPHOR	0.494141
3080		ACADEMIC	LITERAL	METAPHOR	0.493878
3455		ACADEMIC	LITERAL	METAPHOR	0.49375
3258		ACADEMIC	LITERAL	METAPHOR	0.49375
6158		ACADEMIC	LITERAL	METAPHOR	0.49375
5572		ACADEMIC	LITERAL	METAPHOR	0.493656
3422		ACADEMIC	LITERAL	METAPHOR	0.493367
3146		ACADEMIC	LITERAL	METAPHOR	0.493333
3348		ACADEMIC	LITERAL	METAPHOR	0.492562
3550		ACADEMIC	LITERAL	METAPHOR	0.492361
3130		ACADEMIC	LITERAL	METAPHOR	0.491176
3502		ACADEMIC	LITERAL	METAPHOR	0.490625
3174		ACADEMIC	LITERAL	METAPHOR	0.490533
2727		ACADEMIC	LITERAL	METAPHOR	0.490398
3281		ACADEMIC	LITERAL	METAPHOR	0.490306
3356		ACADEMIC	LITERAL	METAPHOR	0.489796
3339		ACADEMIC	LITERAL	METAPHOR	0.489796
3128		ACADEMIC	LITERAL	METAPHOR	0.489286
5001		ACADEMIC	LITERAL	METAPHOR	0.489273
3167		ACADEMIC	LITERAL	METAPHOR	0.489063
3342		ACADEMIC	LITERAL	METAPHOR	0.488581
3254		ACADEMIC	LITERAL	METAPHOR	0.488581
3640		ACADEMIC	LITERAL	METAPHOR	0.487891
3364		ACADEMIC	LITERAL	METAPHOR	0.4875
3114		ACADEMIC	LITERAL	METAPHOR	0.487346
3328		ACADEMIC	LITERAL	METAPHOR	0.487146
5562		ACADEMIC	LITERAL	METAPHOR	0.487111
5000		ACADEMIC	LITERAL	METAPHOR	0.487111
5647		ACADEMIC	LITERAL	METAPHOR	0.486765
3309		ACADEMIC	LITERAL	METAPHOR	0.486765
3403		ACADEMIC	LITERAL	METAPHOR	0.486673
3402		ACADEMIC	LITERAL	METAPHOR	0.486564
3405		ACADEMIC	LITERAL	METAPHOR	0.485714
2971		ACADEMIC	LITERAL	METAPHOR	0.485431
3153		ACADEMIC	LITERAL	METAPHOR	0.48525
5093		ACADEMIC	LITERAL	METAPHOR	0.48466
5651		ACADEMIC	LITERAL	METAPHOR	0.484091
3445		ACADEMIC	LITERAL	METAPHOR	0.483333
3558		ACADEMIC	LITERAL	METAPHOR	0.483333
3398		ACADEMIC	LITERAL	METAPHOR	0.483284
3168		ACADEMIC	LITERAL	METAPHOR	0.48316
3192		ACADEMIC	LITERAL	METAPHOR	0.482699
3607		ACADEMIC	LITERAL	METAPHOR	0.482692
3478		ACADEMIC	LITERAL	METAPHOR	0.482653
3440		ACADEMIC	LITERAL	METAPHOR	0.482422
3224		ACADEMIC	LITERAL	METAPHOR	0.48125
3529		ACADEMIC	LITERAL	METAPHOR	0.48125
5567		ACADEMIC	LITERAL	METAPHOR	0.481228
3144		ACADEMIC	LITERAL	METAPHOR	0.481228
3672		ACADEMIC	LITERAL	METAPHOR	0.480556
3415		ACADEMIC	LITERAL	METAPHOR	0.4805
3157		ACADEMIC	LITERAL	METAPHOR	0.480263
3205		ACADEMIC	LITERAL	METAPHOR	0.48025
3304		ACADEMIC	LITERAL	METAPHOR	0.479412
3188		ACADEMIC	LITERAL	METAPHOR	0.479209
3150		ACADEMIC	LITERAL	METAPHOR	0.479012
5099		ACADEMIC	LITERAL	METAPHOR	0.478395
5362		ACADEMIC	METAPHOR	LITERAL	0.478107
5060		ACADEMIC	METAPHOR	LITERAL	0.477855
1134		ACADEMIC	METAPHOR	LITERAL	0.477778
5667		ACADEMIC	METAPHOR	LITERAL	0.477778
6180		ACADEMIC	METAPHOR	LITERAL	0.477778
1157		ACADEMIC	METAPHOR	LITERAL	0.477667
5438		ACADEMIC	METAPHOR	LITERAL	0.476817
5290		ACADEMIC	METAPHOR	LITERAL	0.476562
2699		ACADEMIC	METAPHOR	LITERAL	0.476562
5331		ACADEMIC	METAPHOR	LITERAL	0.476562
2754		ACADEMIC	METAPHOR	LITERAL	0.476471
6225		ACADEMIC	METAPHOR	LITERAL	0.476389
6130		ACADEMIC	METAPHOR	LITERAL	0.476235
2911		ACADEMIC	METAPHOR	LITERAL	0.476172
6195		ACADEMIC	METAPHOR	LITERAL	0.476172
2903		ACADEMIC	METAPHOR	LITERAL	0.476172
6213		ACADEMIC	METAPHOR	LITERAL	0.47602
5456		ACADEMIC	METAPHOR	LITERAL	0.475781
5787		ACADEMIC	METAPHOR	LITERAL	0.475781
2171		ACADEMIC	METAPHOR	LITERAL	0.475781
5746		ACADEMIC	METAPHOR	LITERAL	0.475692
5594		ACADEMIC	METAPHOR	LITERAL	0.475692
6141		ACADEMIC	METAPHOR	LITERAL	0.475692
3697		ACADEMIC	METAPHOR	LITERAL	0.475444
5358		ACADEMIC	METAPHOR	LITERAL	0.475391
6109		ACADEMIC	METAPHOR	LITERAL	0.475391
5359		ACADEMIC	METAPHOR	LITERAL	0.475391
3053		ACADEMIC	METAPHOR	LITERAL	0.475391
5252		ACADEMIC	METAPHOR	LITERAL	0.475346
5784		ACADEMIC	METAPHOR	LITERAL	0.475309
1100		ACADEMIC	METAPHOR	LITERAL	0.47525
5357		ACADEMIC	METAPHOR	LITERAL	0.475
5479		ACADEMIC	METAPHOR	LITERAL	0.475
6128		ACADEMIC	METAPHOR	LITERAL	0.475
6132		ACADEMIC	METAPHOR	LITERAL	0.475
2707		ACADEMIC	METAPHOR	LITERAL	0.475
2681		ACADEMIC	METAPHOR	LITERAL	0.475
5398		ACADEMIC	METAPHOR	LITERAL	0.475
3713		ACADEMIC	METAPHOR	LITERAL	0.475
5767		ACADEMIC	METAPHOR	LITERAL	0.475
1148		ACADEMIC	METAPHOR	LITERAL	0.475
2772		ACADEMIC	METAPHOR	LITERAL	0.475
5291		ACADEMIC	METAPHOR	LITERAL	0.475
2885		ACADEMIC	METAPHOR	LITERAL	0.475
2912		ACADEMIC	METAPHOR	LITERAL	0.475
2878		ACADEMIC	METAPHOR	LITERAL	0.475
2187		ACADEMIC	METAPHOR	LITERAL	0.47438
3684		ACADEMIC	METAPHOR	LITERAL	0.474222
2867		ACADEMIC	METAPHOR	LITERAL	0.473669
2643		ACADEMIC	METAPHOR	LITERAL	0.473554
1098		ACADEMIC	METAPHOR	LITERAL	0.473529
2703		ACADEMIC	METAPHOR	LITERAL	0.473469
2236		ACADEMIC	METAPHOR	LITERAL	0.472531
2952		ACADEMIC	METAPHOR	LITERAL	0.472449
6139		ACADEMIC	METAPHOR	LITERAL	0.472279
2825		ACADEMIC	METAPHOR	LITERAL	0.472245
1186		ACADEMIC	METAPHOR	LITERAL	0.472222
5740		ACADEMIC	METAPHOR	LITERAL	0.472222
2918		ACADEMIC	METAPHOR	LITERAL	0.471667
5783		ACADEMIC	METAPHOR	LITERAL	0.471429
5045		ACADEMIC	METAPHOR	LITERAL	0.471429
5601		ACADEMIC	METAPHOR	LITERAL	0.47128
2640		ACADEMIC	METAPHOR	LITERAL	0.470934
6219		ACADEMIC	METAPHOR	LITERAL	0.470934
6166		ACADEMIC	METAPHOR	LITERAL	0.470934
6214		ACADEMIC	METAPHOR	LITERAL	0.470588
4999		ACADEMIC	METAPHOR	LITERAL	0.470588
2986		ACADEMIC	METAPHOR	LITERAL	0.4705
5587		ACADEMIC	METAPHOR	LITERAL	0.4705
5418		ACADEMIC	METAPHOR	LITERAL	0.470414
6129		ACADEMIC	METAPHOR	LITERAL	0.47037
2139		ACADEMIC	METAPHOR	LITERAL	0.47025
6133		ACADEMIC	METAPHOR	LITERAL	0.47025
5770		ACADEMIC	METAPHOR	LITERAL	0.470156
1182		ACADEMIC	METAPHOR	LITERAL	0.469922
5317		ACADEMIC	METAPHOR	LITERAL	0.469922
5259		ACADEMIC	METAPHOR	LITERAL	0.469822
2663		ACADEMIC	METAPHOR	LITERAL	0.469753
5733		ACADEMIC	METAPHOR	LITERAL	0.469753
5342		ACADEMIC	METAPHOR	LITERAL	0.469531
2846		ACADEMIC	METAPHOR	LITERAL	0.469531
6226		ACADEMIC	METAPHOR	LITERAL	0.469464
1175		ACADEMIC	METAPHOR	LITERAL	0.469444
5491		ACADEMIC	METAPHOR	LITERAL	0.469388
1126		ACADEMIC	METAPHOR	LITERAL	0.469141
3754		ACADEMIC	METAPHOR	LITERAL	0.469141
2683		ACADEMIC	METAPHOR	LITERAL	0.469141
5743		ACADEMIC	METAPHOR	LITERAL	0.469141
5129		ACADEMIC	METAPHOR	LITERAL	0.468802
2947		ACADEMIC	METAPHOR	LITERAL	0.46875
5425		ACADEMIC	METAPHOR	LITERAL	0.46875
5641		ACADEMIC	METAPHOR	LITERAL	0.468367
2146		ACADEMIC	METAPHOR	LITERAL	0.468367
2114		ACADEMIC	METAPHOR	LITERAL	0.468333
5716		ACADEMIC	METAPHOR	LITERAL	0.468182
5222		ACADEMIC	METAPHOR	LITERAL	0.468112
5087		ACADEMIC	METAPHOR	LITERAL	0.467921
2682		ACADEMIC	METAPHOR	LITERAL	0.467901
3740		ACADEMIC	METAPHOR	LITERAL	0.467556
5432		ACADEMIC	METAPHOR	LITERAL	0.467308
5192		ACADEMIC	METAPHOR	LITERAL	0.467111
2921		ACADEMIC	METAPHOR	LITERAL	0.466667
2102		ACADEMIC	METAPHOR	LITERAL	0.466327
2696		ACADEMIC	METAPHOR	LITERAL	0.466176
3696		ACADEMIC	METAPHOR	LITERAL	0.466163
5615		ACADEMIC	METAPHOR	LITERAL	0.466
5206		ACADEMIC	METAPHOR	LITERAL	0.465909
2664		ACADEMIC	METAPHOR	LITERAL	0.465306
3008		ACADEMIC	METAPHOR	LITERAL	0.465123
1159		ACADEMIC	METAPHOR	LITERAL	0.465052
2849		ACADEMIC	METAPHOR	LITERAL	0.465052
5487		ACADEMIC	METAPHOR	LITERAL	0.465052
5281		ACADEMIC	METAPHOR	LITERAL	0.465052
5747		ACADEMIC	METAPHOR	LITERAL	0.465
5791		ACADEMIC	METAPHOR	LITERAL	0.46482
2701		ACADEMIC	METAPHOR	LITERAL	0.464706
2779		ACADEMIC	METAPHOR	LITERAL	0.464706
6201		ACADEMIC	METAPHOR	LITERAL	0.464286
2704		ACADEMIC	METAPHOR	LITERAL	0.464062
2708		ACADEMIC	METAPHOR	LITERAL	0.464062
3739		ACADEMIC	METAPHOR	LITERAL	0.464062
2966		ACADEMIC	METAPHOR	LITERAL	0.463778
5086		ACADEMIC	METAPHOR	LITERAL	0.463778
5387		ACADEMIC	METAPHOR	LITERAL	0.463672
6172		ACADEMIC	METAPHOR	LITERAL	0.46348
4987		ACADEMIC	METAPHOR	LITERAL	0.463281
5390		ACADEMIC	METAPHOR	LITERAL	0.463281
2739		ACADEMIC	METAPHOR	LITERAL	0.463281
5215		ACADEMIC	METAPHOR	LITERAL	0.463281
5669		ACADEMIC	METAPHOR	LITERAL	0.463281
6171		ACADEMIC	METAPHOR	LITERAL	0.463281
5586		ACADEMIC	METAPHOR	LITERAL	0.463235
2910		ACADEMIC	METAPHOR	LITERAL	0.463
6221		ACADEMIC	METAPHOR	LITERAL	0.462891
5248		ACADEMIC	METAPHOR	LITERAL	0.462674
5514		ACADEMIC	METAPHOR	LITERAL	0.4625
6187		ACADEMIC	METAPHOR	LITERAL	0.4625
2753		ACADEMIC	METAPHOR	LITERAL	0.4625
5337		ACADEMIC	METAPHOR	LITERAL	0.46237
3725		ACADEMIC	METAPHOR	LITERAL	0.46219
5061		ACADEMIC	METAPHOR	LITERAL	0.46213
2831		ACADEMIC	METAPHOR	LITERAL	0.461332
2653		ACADEMIC	METAPHOR	LITERAL	0.460941
5296		ACADEMIC	METAPHOR	LITERAL	0.460889
2957		ACADEMIC	METAPHOR	LITERAL	0.4605
5299		ACADEMIC	METAPHOR	LITERAL	0.460417
5401		ACADEMIC	METAPHOR	LITERAL	0.460308
1103		ACADEMIC	METAPHOR	LITERAL	0.459524
2979		ACADEMIC	METAPHOR	LITERAL	0.459516
5088		ACADEMIC	METAPHOR	LITERAL	0.459516
2103		ACADEMIC	METAPHOR	LITERAL	0.459516
2738		ACADEMIC	METAPHOR	LITERAL	0.459184
5256		ACADEMIC	METAPHOR	LITERAL	0.459091
6218		ACADEMIC	METAPHOR	LITERAL	0.459028
6179		ACADEMIC	METAPHOR	LITERAL	0.458824
3710		ACADEMIC	METAPHOR	LITERAL	0.458507
3042		ACADEMIC	METAPHOR	LITERAL	0.458333
3750		ACADEMIC	METAPHOR	LITERAL	0.458333
3102		ACADEMIC	METAPHOR	LITERAL	0.458045
5621		ACADEMIC	METAPHOR	LITERAL	0.457878
2871		ACADEMIC	METAPHOR	LITERAL	0.457353
5295		ACADEMIC	METAPHOR	LITERAL	0.457353
3748		ACADEMIC	METAPHOR	LITERAL	0.457143
5096		ACADEMIC	METAPHOR	LITERAL	0.457031
2736		ACADEMIC	METAPHOR	LITERAL	0.456893
5785		ACADEMIC	METAPHOR	LITERAL	0.456361
5773		ACADEMIC	METAPHOR	LITERAL	0.455952
2991		ACADEMIC	METAPHOR	LITERAL	0.455769
2839		ACADEMIC	METAPHOR	LITERAL	0.455556
4998		ACADEMIC	METAPHOR	LITERAL	0.455556
2940		ACADEMIC	METAPHOR	LITERAL	0.455556
5795		ACADEMIC	METAPHOR	LITERAL	0.455444
3705		ACADEMIC	METAPHOR	LITERAL	0.45541
6223		ACADEMIC	METAPHOR	LITERAL	0.455247
5185		ACADEMIC	METAPHOR	LITERAL	0.455
5495		ACADEMIC	METAPHOR	LITERAL	0.455
5753		ACADEMIC	METAPHOR	LITERAL	0.454348
1109		ACADEMIC	METAPHOR	LITERAL	0.45434
2692		ACADEMIC	METAPHOR	LITERAL	0.454167
2689		ACADEMIC	METAPHOR	LITERAL	0.453979
5356		ACADEMIC	METAPHOR	LITERAL	0.453633
5470		ACADEMIC	METAPHOR	LITERAL	0.453571
5415		ACADEMIC	METAPHOR	LITERAL	0.453125
5524		ACADEMIC	METAPHOR	LITERAL	0.452778
1172		ACADEMIC	METAPHOR	LITERAL	0.452515
1193		ACADEMIC	METAPHOR	LITERAL	0.451871
2183		ACADEMIC	METAPHOR	LITERAL	0.451817
5267		ACADEMIC	METAPHOR	LITERAL	0.451817
5130		ACADEMIC	METAPHOR	LITERAL	0.451817
5686		ACADEMIC	METAPHOR	LITERAL	0.451562
5254		ACADEMIC	METAPHOR	LITERAL	0.451235
2942		ACADEMIC	METAPHOR	LITERAL	0.451172
2955		ACADEMIC	METAPHOR	LITERAL	0.451
2992		ACADEMIC	METAPHOR	LITERAL	0.450781
3002		ACADEMIC	METAPHOR	LITERAL	0.450781
2693		ACADEMIC	METAPHOR	LITERAL	0.450781
2117		ACADEMIC	METAPHOR	LITERAL	0.450756
5017		ACADEMIC	METAPHOR	LITERAL	0.45051
5499		ACADEMIC	METAPHOR	LITERAL	0.4505
5063		ACADEMIC	METAPHOR	LITERAL	0.4505
2686		ACADEMIC	METAPHOR	LITERAL	0.45048
5537		ACADEMIC	METAPHOR	LITERAL	0.450391
5466		ACADEMIC	METAPHOR	LITERAL	0.450391
5092		ACADEMIC	METAPHOR	LITERAL	0.450383
5229		ACADEMIC	METAPHOR	LITERAL	0.45
1153		ACADEMIC	METAPHOR	LITERAL	0.44938
3699		ACADEMIC	METAPHOR	LITERAL	0.449298
2988		ACADEMIC	METAPHOR	LITERAL	0.448097
6164		ACADEMIC	METAPHOR	LITERAL	0.447751
5517		ACADEMIC	METAPHOR	LITERAL	0.446914
1137		ACADEMIC	METAPHOR	LITERAL	0.446556
5338		ACADEMIC	METAPHOR	LITERAL	0.446154
2153		ACADEMIC	METAPHOR	LITERAL	0.446007
5102		ACADEMIC	METAPHOR	LITERAL	0.445934
5776		ACADEMIC	METAPHOR	LITERAL	0.445934
1183		ACADEMIC	METAPHOR	LITERAL	0.445848
2917		ACADEMIC	METAPHOR	LITERAL	0.445312
5774		ACADEMIC	METAPHOR	LITERAL	0.444922
5265		ACADEMIC	METAPHOR	LITERAL	0.444898
3012		ACADEMIC	METAPHOR	LITERAL	0.444822
6177		ACADEMIC	METAPHOR	LITERAL	0.444822
5369		ACADEMIC	METAPHOR	LITERAL	0.44481
5336		ACADEMIC	METAPHOR	LITERAL	0.444753
5780		ACADEMIC	METAPHOR	LITERAL	0.444464
2665		ACADEMIC	METAPHOR	LITERAL	0.444444
1171		ACADEMIC	METAPHOR	LITERAL	0.444388
3016		ACADEMIC	METAPHOR	LITERAL	0.444379
5779		ACADEMIC	METAPHOR	LITERAL	0.444141
2659		ACADEMIC	METAPHOR	LITERAL	0.444141
5457		ACADEMIC	METAPHOR	LITERAL	0.444141
5590		ACADEMIC	METAPHOR	LITERAL	0.443975
2648		ACADEMIC	METAPHOR	LITERAL	0.44375
2976		ACADEMIC	METAPHOR	LITERAL	0.44375
2691		ACADEMIC	METAPHOR	LITERAL	0.443084
2898		ACADEMIC	METAPHOR	LITERAL	0.442659
5354		ACADEMIC	METAPHOR	LITERAL	0.442593
2215		ACADEMIC	METAPHOR	LITERAL	0.442556
5602		ACADEMIC	METAPHOR	LITERAL	0.442382
2660		ACADEMIC	METAPHOR	LITERAL	0.442215
3726		ACADEMIC	METAPHOR	LITERAL	0.442111
2677		ACADEMIC	METAPHOR	LITERAL	0.441869
3678		ACADEMIC	METAPHOR	LITERAL	0.441869
6157		ACADEMIC	METAPHOR	LITERAL	0.441667
1150		ACADEMIC	METAPHOR	LITERAL	0.441667
2755		ACADEMIC	METAPHOR	LITERAL	0.441667
5240		ACADEMIC	METAPHOR	LITERAL	0.441667
5445		ACADEMIC	METAPHOR	LITERAL	0.441522
5778		ACADEMIC	METAPHOR	LITERAL	0.440828
5745		ACADEMIC	METAPHOR	LITERAL	0.440582
5301		ACADEMIC	METAPHOR	LITERAL	0.440306
2645		ACADEMIC	METAPHOR	LITERAL	0.44025
2671		ACADEMIC	METAPHOR	LITERAL	0.440052
2862		ACADEMIC	METAPHOR	LITERAL	0.440052
2184		ACADEMIC	METAPHOR	LITERAL	0.44
3052		ACADEMIC	METAPHOR	LITERAL	0.439706
5339		ACADEMIC	METAPHOR	LITERAL	0.439543
2138		ACADEMIC	METAPHOR	LITERAL	0.439453
2756		ACADEMIC	METAPHOR	LITERAL	0.439413
2856		ACADEMIC	METAPHOR	LITERAL	0.439229
5062		ACADEMIC	METAPHOR	LITERAL	0.438989
2700		ACADEMIC	METAPHOR	LITERAL	0.438927
2120		ACADEMIC	METAPHOR	LITERAL	0.438889
5330		ACADEMIC	METAPHOR	LITERAL	0.438843
6136		ACADEMIC	METAPHOR	LITERAL	0.438281
2949		ACADEMIC	METAPHOR	LITERAL	0.438265
5308		ACADEMIC	METAPHOR	LITERAL	0.43802
6206		ACADEMIC	METAPHOR	LITERAL	0.4375
1096		ACADEMIC	METAPHOR	LITERAL	0.4375
2651		ACADEMIC	METAPHOR	LITERAL	0.437132
5482		ACADEMIC	METAPHOR	LITERAL	0.43713
3715		ACADEMIC	METAPHOR	LITERAL	0.436111
5764		ACADEMIC	METAPHOR	LITERAL	0.436111
5710		ACADEMIC	METAPHOR	LITERAL	0.435986
5546		ACADEMIC	METAPHOR	LITERAL	0.435
5749		ACADEMIC	METAPHOR	LITERAL	0.434862
5751		ACADEMIC	METAPHOR	LITERAL	0.434722
5441		ACADEMIC	METAPHOR	LITERAL	0.434516
5050		ACADEMIC	METAPHOR	LITERAL	0.43417
5272		ACADEMIC	METAPHOR	LITERAL	0.433824
3000		ACADEMIC	METAPHOR	LITERAL	0.433778
5367		ACADEMIC	METAPHOR	LITERAL	0.433642
5402		ACADEMIC	METAPHOR	LITERAL	0.433333
2774		ACADEMIC	METAPHOR	LITERAL	0.433333
2913		ACADEMIC	METAPHOR	LITERAL	0.433333
3757		ACADEMIC	METAPHOR	LITERAL	0.433333
6220		ACADEMIC	METAPHOR	LITERAL	0.433333
3690		ACADEMIC	METAPHOR	LITERAL	0.432812
3765		ACADEMIC	METAPHOR	LITERAL	0.432653
5687		ACADEMIC	METAPHOR	LITERAL	0.432231
5125		ACADEMIC	METAPHOR	LITERAL	0.432143
5744		ACADEMIC	METAPHOR	LITERAL	0.432031
2140		ACADEMIC	METAPHOR	LITERAL	0.432
2227		ACADEMIC	METAPHOR	LITERAL	0.431641
5797		ACADEMIC	METAPHOR	LITERAL	0.431641
5538		ACADEMIC	METAPHOR	LITERAL	0.431641
5699		ACADEMIC	METAPHOR	LITERAL	0.431641
6194		ACADEMIC	METAPHOR	LITERAL	0.431522
5014		ACADEMIC	METAPHOR	LITERAL	0.431481
2982		ACADEMIC	METAPHOR	LITERAL	0.43125
5480		ACADEMIC	METAPHOR	LITERAL	0.431002
3691		ACADEMIC	METAPHOR	LITERAL	0.430864
3731		ACADEMIC	METAPHOR	LITERAL	0.430556
5029		ACADEMIC	METAPHOR	LITERAL	0.430556
5307		ACADEMIC	METAPHOR	LITERAL	0.430104
5196		ACADEMIC	METAPHOR	LITERAL	0.429932
5078		ACADEMIC	METAPHOR	LITERAL	0.429758
5327		ACADEMIC	METAPHOR	LITERAL	0.429758
3100		ACADEMIC	METAPHOR	LITERAL	0.429752
5103		ACADEMIC	METAPHOR	LITERAL	0.429545
5759		ACADEMIC	METAPHOR	LITERAL	0.429438
2887		ACADEMIC	METAPHOR	LITERAL	0.429412
2907		ACADEMIC	METAPHOR	LITERAL	0.429412
1198		ACADEMIC	METAPHOR	LITERAL	0.429012
2956		ACADEMIC	METAPHOR	LITERAL	0.428846
5442		ACADEMIC	METAPHOR	LITERAL	0.428571
2748		ACADEMIC	METAPHOR	LITERAL	0.428464
6174		ACADEMIC	METAPHOR	LITERAL	0.428395
2726		ACADEMIC	METAPHOR	LITERAL	0.428086
2914		ACADEMIC	METAPHOR	LITERAL	0.428
6144		ACADEMIC	METAPHOR	LITERAL	0.427941
3714		ACADEMIC	METAPHOR	LITERAL	0.427556
6160		ACADEMIC	METAPHOR	LITERAL	0.427479
5709		ACADEMIC	METAPHOR	LITERAL	0.427273
3722		ACADEMIC	METAPHOR	LITERAL	0.426667
2206		ACADEMIC	METAPHOR	LITERAL	0.426563
2985		ACADEMIC	METAPHOR	LITERAL	0.426471
2896		ACADEMIC	METAPHOR	LITERAL	0.426471
5698		ACADEMIC	METAPHOR	LITERAL	0.426235
3034		ACADEMIC	METAPHOR	LITERAL	0.426172
6162		ACADEMIC	METAPHOR	LITERAL	0.426
3087		ACADEMIC	METAPHOR	LITERAL	0.42575
5690		ACADEMIC	METAPHOR	LITERAL	0.425694
1117		ACADEMIC	METAPHOR	LITERAL	0.425694
3003		ACADEMIC	METAPHOR	LITERAL	0.425391
5595		ACADEMIC	METAPHOR	LITERAL	0.425207
6110		ACADEMIC	METAPHOR	LITERAL	0.425
2888		ACADEMIC	METAPHOR	LITERAL	0.425
3014		ACADEMIC	METAPHOR	LITERAL	0.425
5361		ACADEMIC	METAPHOR	LITERAL	0.422751
2882		ACADEMIC	METAPHOR	LITERAL	0.422059
2676		ACADEMIC	METAPHOR	LITERAL	0.421914
5191		ACADEMIC	METAPHOR	LITERAL	0.421667
2915		ACADEMIC	METAPHOR	LITERAL	0.42075
5289		ACADEMIC	METAPHOR	LITERAL	0.420679
1106		ACADEMIC	METAPHOR	LITERAL	0.42037
5335		ACADEMIC	METAPHOR	LITERAL	0.42
5008		ACADEMIC	METAPHOR	LITERAL	0.42
5777		ACADEMIC	METAPHOR	LITERAL	0.419141
5569		ACADEMIC	METAPHOR	LITERAL	0.419031
2195		ACADEMIC	METAPHOR	LITERAL	0.419
3719		ACADEMIC	METAPHOR	LITERAL	0.41875
6173		ACADEMIC	METAPHOR	LITERAL	0.417647
5738		ACADEMIC	METAPHOR	LITERAL	0.417562
3005		ACADEMIC	METAPHOR	LITERAL	0.417361
2927		ACADEMIC	METAPHOR	LITERAL	0.417
1141		ACADEMIC	METAPHOR	LITERAL	0.416667
2185		ACADEMIC	METAPHOR	LITERAL	0.416667
2953		ACADEMIC	METAPHOR	LITERAL	0.416667
5285		ACADEMIC	METAPHOR	LITERAL	0.416667
5334		ACADEMIC	METAPHOR	LITERAL	0.416667
5603		ACADEMIC	METAPHOR	LITERAL	0.415993
5605		ACADEMIC	METAPHOR	LITERAL	0.4155
2225		ACADEMIC	METAPHOR	LITERAL	0.415444
5636		ACADEMIC	METAPHOR	LITERAL	0.41516
2761		ACADEMIC	METAPHOR	LITERAL	0.415
5422		ACADEMIC	METAPHOR	LITERAL	0.414761
2694		ACADEMIC	METAPHOR	LITERAL	0.414286
3030		ACADEMIC	METAPHOR	LITERAL	0.413672
6208		ACADEMIC	METAPHOR	LITERAL	0.413017
2737		ACADEMIC	METAPHOR	LITERAL	0.412891
3735		ACADEMIC	METAPHOR	LITERAL	0.412119
5694		ACADEMIC	METAPHOR	LITERAL	0.412111
2684		ACADEMIC	METAPHOR	LITERAL	0.412024
6175		ACADEMIC	METAPHOR	LITERAL	0.411765
2722		ACADEMIC	METAPHOR	LITERAL	0.41157
5277		ACADEMIC	METAPHOR	LITERAL	0.411538
5371		ACADEMIC	METAPHOR	LITERAL	0.411111
3761		ACADEMIC	METAPHOR	LITERAL	0.41064
3770		ACADEMIC	METAPHOR	LITERAL	0.41025
2662		ACADEMIC	METAPHOR	LITERAL	0.409568
1189		ACADEMIC	METAPHOR	LITERAL	0.40917
3048		ACADEMIC	METAPHOR	LITERAL	0.408333
2941		ACADEMIC	METAPHOR	LITERAL	0.406641
5346		ACADEMIC	METAPHOR	LITERAL	0.40625
5073		ACADEMIC	METAPHOR	LITERAL	0.40625
5400		ACADEMIC	METAPHOR	LITERAL	0.405882
5075		ACADEMIC	METAPHOR	LITERAL	0.405612
2174		ACADEMIC	METAPHOR	LITERAL	0.405556
5535		ACADEMIC	METAPHOR	LITERAL	0.404438
6135		ACADEMIC	METAPHOR	LITERAL	0.404082
5388		ACADEMIC	METAPHOR	LITERAL	0.403571
1145		ACADEMIC	METAPHOR	LITERAL	0.403125
5506		ACADEMIC	METAPHOR	LITERAL	0.402778
3033		ACADEMIC	METAPHOR	LITERAL	0.402126
2646		ACADEMIC	METAPHOR	LITERAL	0.401389
2698		ACADEMIC	METAPHOR	LITERAL	0.401038
3711		ACADEMIC	METAPHOR	LITERAL	0.400926
5509		ACADEMIC	METAPHOR	LITERAL	0.400692
5239		ACADEMIC	METAPHOR	LITERAL	0.400444
1099		ACADEMIC	METAPHOR	LITERAL	0.4
2137		ACADEMIC	METAPHOR	LITERAL	0.4
5416		ACADEMIC	METAPHOR	LITERAL	0.399913
5763		ACADEMIC	METAPHOR	LITERAL	0.399567
2835		ACADEMIC	METAPHOR	LITERAL	0.398529
2163		ACADEMIC	METAPHOR	LITERAL	0.398529
3743		ACADEMIC	METAPHOR	LITERAL	0.398457
5596		ACADEMIC	METAPHOR	LITERAL	0.397917
5646		ACADEMIC	METAPHOR	LITERAL	0.39784
2234		ACADEMIC	METAPHOR	LITERAL	0.397222
5094		ACADEMIC	METAPHOR	LITERAL	0.397
2173		ACADEMIC	METAPHOR	LITERAL	0.396667
5333		ACADEMIC	METAPHOR	LITERAL	0.396
5678		ACADEMIC	METAPHOR	LITERAL	0.395455
3721		ACADEMIC	METAPHOR	LITERAL	0.394955
3700		ACADEMIC	METAPHOR	LITERAL	0.394898
2115		ACADEMIC	METAPHOR	LITERAL	0.394675
5781		ACADEMIC	METAPHOR	LITERAL	0.394215
2752		ACADEMIC	METAPHOR	LITERAL	0.394141
2188		ACADEMIC	METAPHOR	LITERAL	0.394
5737		ACADEMIC	METAPHOR	LITERAL	0.393
2742		ACADEMIC	METAPHOR	LITERAL	0.392993
5381		ACADEMIC	METAPHOR	LITERAL	0.392857
5220		ACADEMIC	METAPHOR	LITERAL	0.392361
5028		ACADEMIC	METAPHOR	LITERAL	0.391935
2121		ACADEMIC	METAPHOR	LITERAL	0.391837
5007		ACADEMIC	METAPHOR	LITERAL	0.391327
5701		ACADEMIC	METAPHOR	LITERAL	0.389807
6149		ACADEMIC	METAPHOR	LITERAL	0.388581
5246		ACADEMIC	METAPHOR	LITERAL	0.388281
5328		ACADEMIC	METAPHOR	LITERAL	0.387037
5704		ACADEMIC	METAPHOR	LITERAL	0.386667
5519		ACADEMIC	METAPHOR	LITERAL	0.386224
3717		ACADEMIC	METAPHOR	LITERAL	0.386111
5697		ACADEMIC	METAPHOR	LITERAL	0.384765
2998		ACADEMIC	METAPHOR	LITERAL	0.384615
2105		ACADEMIC	METAPHOR	LITERAL	0.384467
1129		ACADEMIC	METAPHOR	LITERAL	0.383642
3060		ACADEMIC	METAPHOR	LITERAL	0.383471
2865		ACADEMIC	METAPHOR	LITERAL	0.383333
3020		ACADEMIC	METAPHOR	LITERAL	0.381641
2641		ACADEMIC	METAPHOR	LITERAL	0.381371
5503		ACADEMIC	METAPHOR	LITERAL	0.378
3720		ACADEMIC	METAPHOR	LITERAL	0.376563
3736		ACADEMIC	METAPHOR	LITERAL	0.375391
1143		ACADEMIC	METAPHOR	LITERAL	0.375
2860		ACADEMIC	METAPHOR	LITERAL	0.375
5344		ACADEMIC	METAPHOR	LITERAL	0.375
5365		ACADEMIC	METAPHOR	LITERAL	0.375
5464		ACADEMIC	METAPHOR	LITERAL	0.37426
5512		ACADEMIC	METAPHOR	LITERAL	0.369922
6215		ACADEMIC	METAPHOR	LITERAL	0.369464
5382		ACADEMIC	METAPHOR	LITERAL	0.369141
5392		ACADEMIC	METAPHOR	LITERAL	0.366667
5407		ACADEMIC	METAPHOR	LITERAL	0.366667
6224		ACADEMIC	METAPHOR	LITERAL	0.36616
5724		ACADEMIC	METAPHOR	LITERAL	0.365625
5493		ACADEMIC	METAPHOR	LITERAL	0.364512
2962		ACADEMIC	METAPHOR	LITERAL	0.364063
3046		ACADEMIC	METAPHOR	LITERAL	0.363927
2946		ACADEMIC	METAPHOR	LITERAL	0.361667
5002		ACADEMIC	METAPHOR	LITERAL	0.357292
5143		ACADEMIC	METAPHOR	LITERAL	0.354082
5613		ACADEMIC	METAPHOR	LITERAL	0.352
5481		ACADEMIC	METAPHOR	LITERAL	0.351172
2218		ACADEMIC	METAPHOR	LITERAL	0.35
5302		ACADEMIC	METAPHOR	LITERAL	0.35
2650		ACADEMIC	METAPHOR	LITERAL	0.342901
3676		ACADEMIC	METAPHOR	LITERAL	0.341667
5183		ACADEMIC	METAPHOR	LITERAL	0.339453
5717		ACADEMIC	METAPHOR	LITERAL	0.335
2954		ACADEMIC	METAPHOR	LITERAL	0.33125
2669		ACADEMIC	METAPHOR	LITERAL	0.330556
5211		ACADEMIC	METAPHOR	LITERAL	0.327778
5715		ACADEMIC	METAPHOR	LITERAL	0.327
5004		ACADEMIC	METAPHOR	LITERAL	0.322917
5091		ACADEMIC	METAPHOR	LITERAL	0.316667
5202		ACADEMIC	METAPHOR	LITERAL	0.316667
2122		ACADEMIC	METAPHOR	LITERAL	0.316667
5286		ACADEMIC	METAPHOR	LITERAL	0.316667
5754		ACADEMIC	METAPHOR	LITERAL	0.309667
3019		ACADEMIC	METAPHOR	LITERAL	0.309028
2850		ACADEMIC	METAPHOR	LITERAL	0.287755
2785		ACADEMIC	METAPHOR	LITERAL	0.287667
3706		ACADEMIC	METAPHOR	LITERAL	0.253125
5146		ACADEMIC	METAPHOR	LITERAL	0.231667
2675		ACADEMIC	METAPHOR	LITERAL	0.225
2823		ACADEMIC	METAPHOR	LITERAL	0.172917
2226		ACADEMIC	METAPHOR	METAPHOR	0.775
6121		ACADEMIC	METAPHOR	METAPHOR	0.652111
2154		ACADEMIC	METAPHOR	METAPHOR	0.65
5560		ACADEMIC	METAPHOR	METAPHOR	0.648077
2880		ACADEMIC	METAPHOR	METAPHOR	0.644444
2808		ACADEMIC	METAPHOR	METAPHOR	0.64375
5216		ACADEMIC	METAPHOR	METAPHOR	0.642857
2989		ACADEMIC	METAPHOR	METAPHOR	0.640385
6167		ACADEMIC	METAPHOR	METAPHOR	0.635
2908		ACADEMIC	METAPHOR	METAPHOR	0.634091
3006		ACADEMIC	METAPHOR	METAPHOR	0.631
2889		ACADEMIC	METAPHOR	METAPHOR	0.630882
1101		ACADEMIC	METAPHOR	METAPHOR	0.63025
5782		ACADEMIC	METAPHOR	METAPHOR	0.627273
5494		ACADEMIC	METAPHOR	METAPHOR	0.626563
2725		ACADEMIC	METAPHOR	METAPHOR	0.626
5635		ACADEMIC	METAPHOR	METAPHOR	0.625617
3766		ACADEMIC	METAPHOR	METAPHOR	0.625346
6183		ACADEMIC	METAPHOR	METAPHOR	0.625
3595		ACADEMIC	METAPHOR	METAPHOR	0.622222
3709		ACADEMIC	METAPHOR	METAPHOR	0.622222
6191		ACADEMIC	METAPHOR	METAPHOR	0.621053
6227		ACADEMIC	METAPHOR	METAPHOR	0.620833
5739		ACADEMIC	METAPHOR	METAPHOR	0.62
2706		ACADEMIC	METAPHOR	METAPHOR	0.619444
3679		ACADEMIC	METAPHOR	METAPHOR	0.61875
5377		ACADEMIC	METAPHOR	METAPHOR	0.618182
5792		ACADEMIC	METAPHOR	METAPHOR	0.616736
5760		ACADEMIC	METAPHOR	METAPHOR	0.616667
3011		ACADEMIC	METAPHOR	METAPHOR	0.616667
2928		ACADEMIC	METAPHOR	METAPHOR	0.613889
3718		ACADEMIC	METAPHOR	METAPHOR	0.613235
5133		ACADEMIC	METAPHOR	METAPHOR	0.6125
5468		ACADEMIC	METAPHOR	METAPHOR	0.6125
2216		ACADEMIC	METAPHOR	METAPHOR	0.609211
5058		ACADEMIC	METAPHOR	METAPHOR	0.608876
5314		ACADEMIC	METAPHOR	METAPHOR	0.608333
5756		ACADEMIC	METAPHOR	METAPHOR	0.607353
5059		ACADEMIC	METAPHOR	METAPHOR	0.606818
5022		ACADEMIC	METAPHOR	METAPHOR	0.60625
5258		ACADEMIC	METAPHOR	METAPHOR	0.605556
2893		ACADEMIC	METAPHOR	METAPHOR	0.605
2854		ACADEMIC	METAPHOR	METAPHOR	0.602778
2788		ACADEMIC	METAPHOR	METAPHOR	0.602778
5018		ACADEMIC	METAPHOR	METAPHOR	0.601471
2110		ACADEMIC	METAPHOR	METAPHOR	0.601389
5501		ACADEMIC	METAPHOR	METAPHOR	0.600826
2950		ACADEMIC	METAPHOR	METAPHOR	0.600826
2764		ACADEMIC	METAPHOR	METAPHOR	0.600391
1168		ACADEMIC	METAPHOR	METAPHOR	0.600391
2158		ACADEMIC	METAPHOR	METAPHOR	0.6
5473		ACADEMIC	METAPHOR	METAPHOR	0.6
2729		ACADEMIC	METAPHOR	METAPHOR	0.6
3056		ACADEMIC	METAPHOR	METAPHOR	0.6
3712		ACADEMIC	METAPHOR	METAPHOR	0.6
2960		ACADEMIC	METAPHOR	METAPHOR	0.6
3092		ACADEMIC	METAPHOR	METAPHOR	0.6
4993		ACADEMIC	METAPHOR	METAPHOR	0.6
5725		ACADEMIC	METAPHOR	METAPHOR	0.6
3732		ACADEMIC	METAPHOR	METAPHOR	0.6
2202		ACADEMIC	METAPHOR	METAPHOR	0.6
6119		ACADEMIC	METAPHOR	METAPHOR	0.6
3010		ACADEMIC	METAPHOR	METAPHOR	0.6
2886		ACADEMIC	METAPHOR	METAPHOR	0.6
5232		ACADEMIC	METAPHOR	METAPHOR	0.6
5386		ACADEMIC	METAPHOR	METAPHOR	0.6
5752		ACADEMIC	METAPHOR	METAPHOR	0.6
5666		ACADEMIC	METAPHOR	METAPHOR	0.597934
2147		ACADEMIC	METAPHOR	METAPHOR	0.597531
5476		ACADEMIC	METAPHOR	METAPHOR	0.59679
2201		ACADEMIC	METAPHOR	METAPHOR	0.596429
5188		ACADEMIC	METAPHOR	METAPHOR	0.596429
2106		ACADEMIC	METAPHOR	METAPHOR	0.596
5372		ACADEMIC	METAPHOR	METAPHOR	0.595
2944		ACADEMIC	METAPHOR	METAPHOR	0.594943
5112		ACADEMIC	METAPHOR	METAPHOR	0.594754
2964		ACADEMIC	METAPHOR	METAPHOR	0.594531
5316		ACADEMIC	METAPHOR	METAPHOR	0.594231
5570		ACADEMIC	METAPHOR	METAPHOR	0.593778
2179		ACADEMIC	METAPHOR	METAPHOR	0.59375
6115		ACADEMIC	METAPHOR	METAPHOR	0.59375
6205		ACADEMIC	METAPHOR	METAPHOR	0.59375
3035		ACADEMIC	METAPHOR	METAPHOR	0.59375
1097		ACADEMIC	METAPHOR	METAPHOR	0.593333
5341		ACADEMIC	METAPHOR	METAPHOR	0.593182
5790		ACADEMIC	METAPHOR	METAPHOR	0.592308
5131		ACADEMIC	METAPHOR	METAPHOR	0.592
5263		ACADEMIC	METAPHOR	METAPHOR	0.592
6210		ACADEMIC	METAPHOR	METAPHOR	0.591941
2999		ACADEMIC	METAPHOR	METAPHOR	0.591667
2936		ACADEMIC	METAPHOR	METAPHOR	0.591667
2981		ACADEMIC	METAPHOR	METAPHOR	0.591667
1165		ACADEMIC	METAPHOR	METAPHOR	0.590909
2890		ACADEMIC	METAPHOR	METAPHOR	0.59
5408		ACADEMIC	METAPHOR	METAPHOR	0.59
2157		ACADEMIC	METAPHOR	METAPHOR	0.59
5245		ACADEMIC	METAPHOR	METAPHOR	0.589796
5755		ACADEMIC	METAPHOR	METAPHOR	0.589706
3059		ACADEMIC	METAPHOR	METAPHOR	0.588581
6170		ACADEMIC	METAPHOR	METAPHOR	0.588281
2193		ACADEMIC	METAPHOR	METAPHOR	0.587891
5676		ACADEMIC	METAPHOR	METAPHOR	0.5875
2204		ACADEMIC	METAPHOR	METAPHOR	0.586777
5793		ACADEMIC	METAPHOR	METAPHOR	0.586667
5683		ACADEMIC	METAPHOR	METAPHOR	0.586667
3682		ACADEMIC	METAPHOR	METAPHOR	0.586667
5485		ACADEMIC	METAPHOR	METAPHOR	0.586111
5057		ACADEMIC	METAPHOR	METAPHOR	0.585714
5498		ACADEMIC	METAPHOR	METAPHOR	0.585714
3762		ACADEMIC	METAPHOR	METAPHOR	0.585
5325		ACADEMIC	METAPHOR	METAPHOR	0.584615
2160		ACADEMIC	METAPHOR	METAPHOR	0.584028
2891		ACADEMIC	METAPHOR	METAPHOR	0.584028
2892		ACADEMIC	METAPHOR	METAPHOR	0.584028
5451		ACADEMIC	METAPHOR	METAPHOR	0.583824
2747		ACADEMIC	METAPHOR	METAPHOR	0.583824
3038		ACADEMIC	METAPHOR	METAPHOR	0.583824
2995		ACADEMIC	METAPHOR	METAPHOR	0.583333
2713		ACADEMIC	METAPHOR	METAPHOR	0.583333
5120		ACADEMIC	METAPHOR	METAPHOR	0.583333
5507		ACADEMIC	METAPHOR	METAPHOR	0.583333
2958		ACADEMIC	METAPHOR	METAPHOR	0.583333
5500		ACADEMIC	METAPHOR	METAPHOR	0.583163
6126		ACADEMIC	METAPHOR	METAPHOR	0.582653
5212		ACADEMIC	METAPHOR	METAPHOR	0.582353
5132		ACADEMIC	METAPHOR	METAPHOR	0.582353
2099		ACADEMIC	METAPHOR	METAPHOR	0.582143
5101		ACADEMIC	METAPHOR	METAPHOR	0.582143
3031		ACADEMIC	METAPHOR	METAPHOR	0.582031
5631		ACADEMIC	METAPHOR	METAPHOR	0.581818
2150		ACADEMIC	METAPHOR	METAPHOR	0.581818
3694		ACADEMIC	METAPHOR	METAPHOR	0.58125
2723		ACADEMIC	METAPHOR	METAPHOR	0.580952
3693		ACADEMIC	METAPHOR	METAPHOR	0.580952
5255		ACADEMIC	METAPHOR	METAPHOR	0.580864
1173		ACADEMIC	METAPHOR	METAPHOR	0.58083
2869		ACADEMIC	METAPHOR	METAPHOR	0.5805
5730		ACADEMIC	METAPHOR	METAPHOR	0.58
2161		ACADEMIC	METAPHOR	METAPHOR	0.58
5723		ACADEMIC	METAPHOR	METAPHOR	0.579412
5547		ACADEMIC	METAPHOR	METAPHOR	0.578628
5771		ACADEMIC	METAPHOR	METAPHOR	0.578571
3769		ACADEMIC	METAPHOR	METAPHOR	0.578571
5582		ACADEMIC	METAPHOR	METAPHOR	0.578333
5348		ACADEMIC	METAPHOR	METAPHOR	0.578287
5544		ACADEMIC	METAPHOR	METAPHOR	0.577941
5260		ACADEMIC	METAPHOR	METAPHOR	0.576923
3082		ACADEMIC	METAPHOR	METAPHOR	0.576923
5266		ACADEMIC	METAPHOR	METAPHOR	0.576923
5322		ACADEMIC	METAPHOR	METAPHOR	0.576471
5579		ACADEMIC	METAPHOR	METAPHOR	0.576338
5373		ACADEMIC	METAPHOR	METAPHOR	0.57602
5497		ACADEMIC	METAPHOR	METAPHOR	0.57549
6169		ACADEMIC	METAPHOR	METAPHOR	0.575391
2205		ACADEMIC	METAPHOR	METAPHOR	0.575391
2715		ACADEMIC	METAPHOR	METAPHOR	0.575391
3083		ACADEMIC	METAPHOR	METAPHOR	0.57525
5598		ACADEMIC	METAPHOR	METAPHOR	0.57525
5707		ACADEMIC	METAPHOR	METAPHOR	0.575
5772		ACADEMIC	METAPHOR	METAPHOR	0.575
5775		ACADEMIC	METAPHOR	METAPHOR	0.575
5742		ACADEMIC	METAPHOR	METAPHOR	0.575
3751		ACADEMIC	METAPHOR	METAPHOR	0.575
3049		ACADEMIC	METAPHOR	METAPHOR	0.575
3081		ACADEMIC	METAPHOR	METAPHOR	0.575
5033		ACADEMIC	METAPHOR	METAPHOR	0.575
6143		ACADEMIC	METAPHOR	METAPHOR	0.575
5443		ACADEMIC	METAPHOR	METAPHOR	0.575
1152		ACADEMIC	METAPHOR	METAPHOR	0.575
5364		ACADEMIC	METAPHOR	METAPHOR	0.575
5234		ACADEMIC	METAPHOR	METAPHOR	0.575
2168		ACADEMIC	METAPHOR	METAPHOR	0.574238
5009		ACADEMIC	METAPHOR	METAPHOR	0.573961
2151		ACADEMIC	METAPHOR	METAPHOR	0.573778
3055		ACADEMIC	METAPHOR	METAPHOR	0.573333
5484		ACADEMIC	METAPHOR	METAPHOR	0.573333
2101		ACADEMIC	METAPHOR	METAPHOR	0.572727
5720		ACADEMIC	METAPHOR	METAPHOR	0.572727
2148		ACADEMIC	METAPHOR	METAPHOR	0.572727
5242		ACADEMIC	METAPHOR	METAPHOR	0.572531
5542		ACADEMIC	METAPHOR	METAPHOR	0.572436
2232		ACADEMIC	METAPHOR	METAPHOR	0.572306
5171		ACADEMIC	METAPHOR	METAPHOR	0.571746
2905		ACADEMIC	METAPHOR	METAPHOR	0.571667
3086		ACADEMIC	METAPHOR	METAPHOR	0.571429
5548		ACADEMIC	METAPHOR	METAPHOR	0.570934
5217		ACADEMIC	METAPHOR	METAPHOR	0.570588
5552		ACADEMIC	METAPHOR	METAPHOR	0.570455
2828		ACADEMIC	METAPHOR	METAPHOR	0.57025
5520		ACADEMIC	METAPHOR	METAPHOR	0.57
3054		ACADEMIC	METAPHOR	METAPHOR	0.57
2784		ACADEMIC	METAPHOR	METAPHOR	0.57
2836		ACADEMIC	METAPHOR	METAPHOR	0.569531
5721		ACADEMIC	METAPHOR	METAPHOR	0.569531
2129		ACADEMIC	METAPHOR	METAPHOR	0.569531
2731		ACADEMIC	METAPHOR	METAPHOR	0.569531
5016		ACADEMIC	METAPHOR	METAPHOR	0.569231
2182		ACADEMIC	METAPHOR	METAPHOR	0.569141
5158		ACADEMIC	METAPHOR	METAPHOR	0.569141
5649		ACADEMIC	METAPHOR	METAPHOR	0.569141
6146		ACADEMIC	METAPHOR	METAPHOR	0.569141
6185		ACADEMIC	METAPHOR	METAPHOR	0.569141
6193		ACADEMIC	METAPHOR	METAPHOR	0.569084
2104		ACADEMIC	METAPHOR	METAPHOR	0.568939
2107		ACADEMIC	METAPHOR	METAPHOR	0.568878
3066		ACADEMIC	METAPHOR	METAPHOR	0.56875
5513		ACADEMIC	METAPHOR	METAPHOR	0.56875
5089		ACADEMIC	METAPHOR	METAPHOR	0.56875
5380		ACADEMIC	METAPHOR	METAPHOR	0.56875
2902		ACADEMIC	METAPHOR	METAPHOR	0.56875
2923		ACADEMIC	METAPHOR	METAPHOR	0.56875
2857		ACADEMIC	METAPHOR	METAPHOR	0.568483
5282		ACADEMIC	METAPHOR	METAPHOR	0.568367
1110		ACADEMIC	METAPHOR	METAPHOR	0.568367
5554		ACADEMIC	METAPHOR	METAPHOR	0.568333
3075		ACADEMIC	METAPHOR	METAPHOR	0.567556
5395		ACADEMIC	METAPHOR	METAPHOR	0.567111
2883		ACADEMIC	METAPHOR	METAPHOR	0.566869
6163		ACADEMIC	METAPHOR	METAPHOR	0.566667
2690		ACADEMIC	METAPHOR	METAPHOR	0.566667
5664		ACADEMIC	METAPHOR	METAPHOR	0.566667
5700		ACADEMIC	METAPHOR	METAPHOR	0.566667
5786		ACADEMIC	METAPHOR	METAPHOR	0.566667
6118		ACADEMIC	METAPHOR	METAPHOR	0.566529
5214		ACADEMIC	METAPHOR	METAPHOR	0.566304
5340		ACADEMIC	METAPHOR	METAPHOR	0.566176
3728		ACADEMIC	METAPHOR	METAPHOR	0.565385
2172		ACADEMIC	METAPHOR	METAPHOR	0.56525
5145		ACADEMIC	METAPHOR	METAPHOR	0.565052
5431		ACADEMIC	METAPHOR	METAPHOR	0.565052
5735		ACADEMIC	METAPHOR	METAPHOR	0.565052
5024		ACADEMIC	METAPHOR	METAPHOR	0.565
2904		ACADEMIC	METAPHOR	METAPHOR	0.565
2666		ACADEMIC	METAPHOR	METAPHOR	0.564796
5098		ACADEMIC	METAPHOR	METAPHOR	0.564706
3742		ACADEMIC	METAPHOR	METAPHOR	0.564706
5486		ACADEMIC	METAPHOR	METAPHOR	0.564706
5691		ACADEMIC	METAPHOR	METAPHOR	0.564463
3013		ACADEMIC	METAPHOR	METAPHOR	0.564463
5241		ACADEMIC	METAPHOR	METAPHOR	0.564053
2143		ACADEMIC	METAPHOR	METAPHOR	0.563636
3716		ACADEMIC	METAPHOR	METAPHOR	0.563581
3723		ACADEMIC	METAPHOR	METAPHOR	0.56358
2969		ACADEMIC	METAPHOR	METAPHOR	0.563281
3702		ACADEMIC	METAPHOR	METAPHOR	0.563235
5351		ACADEMIC	METAPHOR	METAPHOR	0.563158
5389		ACADEMIC	METAPHOR	METAPHOR	0.562891
3072		ACADEMIC	METAPHOR	METAPHOR	0.562891
6176		ACADEMIC	METAPHOR	METAPHOR	0.562891
5465		ACADEMIC	METAPHOR	METAPHOR	0.562891
5472		ACADEMIC	METAPHOR	METAPHOR	0.562847
5652		ACADEMIC	METAPHOR	METAPHOR	0.5625
3050		ACADEMIC	METAPHOR	METAPHOR	0.562188
2932		ACADEMIC	METAPHOR	METAPHOR	0.562132
5748		ACADEMIC	METAPHOR	METAPHOR	0.562
2851		ACADEMIC	METAPHOR	METAPHOR	0.561667
5599		ACADEMIC	METAPHOR	METAPHOR	0.561667
5235		ACADEMIC	METAPHOR	METAPHOR	0.561538
2881		ACADEMIC	METAPHOR	METAPHOR	0.561538
3101		ACADEMIC	METAPHOR	METAPHOR	0.561224
2815		ACADEMIC	METAPHOR	METAPHOR	0.560986
2937		ACADEMIC	METAPHOR	METAPHOR	0.560714
5243		ACADEMIC	METAPHOR	METAPHOR	0.560714
3756		ACADEMIC	METAPHOR	METAPHOR	0.560714
3009		ACADEMIC	METAPHOR	METAPHOR	0.56064
4988		ACADEMIC	METAPHOR	METAPHOR	0.559911
5167		ACADEMIC	METAPHOR	METAPHOR	0.559722
5673		ACADEMIC	METAPHOR	METAPHOR	0.559615
2685		ACADEMIC	METAPHOR	METAPHOR	0.559615
5134		ACADEMIC	METAPHOR	METAPHOR	0.559222
5315		ACADEMIC	METAPHOR	METAPHOR	0.55917
5041		ACADEMIC	METAPHOR	METAPHOR	0.558824
3727		ACADEMIC	METAPHOR	METAPHOR	0.558824
2916		ACADEMIC	METAPHOR	METAPHOR	0.55856
2200		ACADEMIC	METAPHOR	METAPHOR	0.558333
2711		ACADEMIC	METAPHOR	METAPHOR	0.558333
5193		ACADEMIC	METAPHOR	METAPHOR	0.558333
2647		ACADEMIC	METAPHOR	METAPHOR	0.558273
2108		ACADEMIC	METAPHOR	METAPHOR	0.558163
2938		ACADEMIC	METAPHOR	METAPHOR	0.558025
5591		ACADEMIC	METAPHOR	METAPHOR	0.557798
5347		ACADEMIC	METAPHOR	METAPHOR	0.557759
2180		ACADEMIC	METAPHOR	METAPHOR	0.557653
5321		ACADEMIC	METAPHOR	METAPHOR	0.557653
2782		ACADEMIC	METAPHOR	METAPHOR	0.557596
5766		ACADEMIC	METAPHOR	METAPHOR	0.557422
5237		ACADEMIC	METAPHOR	METAPHOR	0.557353
3688		ACADEMIC	METAPHOR	METAPHOR	0.557353
2144		ACADEMIC	METAPHOR	METAPHOR	0.557143
2884		ACADEMIC	METAPHOR	METAPHOR	0.557031
5463		ACADEMIC	METAPHOR	METAPHOR	0.556667
5474		ACADEMIC	METAPHOR	METAPHOR	0.556641
2169		ACADEMIC	METAPHOR	METAPHOR	0.556641
2192		ACADEMIC	METAPHOR	METAPHOR	0.556641
5532		ACADEMIC	METAPHOR	METAPHOR	0.556641
6178		ACADEMIC	METAPHOR	METAPHOR	0.556641
2177		ACADEMIC	METAPHOR	METAPHOR	0.55625
3044		ACADEMIC	METAPHOR	METAPHOR	0.55625
3099		ACADEMIC	METAPHOR	METAPHOR	0.55625
3767		ACADEMIC	METAPHOR	METAPHOR	0.55625
2987		ACADEMIC	METAPHOR	METAPHOR	0.555864
5363		ACADEMIC	METAPHOR	METAPHOR	0.555864
5461		ACADEMIC	METAPHOR	METAPHOR	0.555556
3741		ACADEMIC	METAPHOR	METAPHOR	0.555556
1128		ACADEMIC	METAPHOR	METAPHOR	0.555372
2948		ACADEMIC	METAPHOR	METAPHOR	0.555372
5675		ACADEMIC	METAPHOR	METAPHOR	0.555104
5447		ACADEMIC	METAPHOR	METAPHOR	0.555
2196		ACADEMIC	METAPHOR	METAPHOR	0.554762
3017		ACADEMIC	METAPHOR	METAPHOR	0.554545
5696		ACADEMIC	METAPHOR	METAPHOR	0.554545
6145		ACADEMIC	METAPHOR	METAPHOR	0.554438
5072		ACADEMIC	METAPHOR	METAPHOR	0.554412
2997		ACADEMIC	METAPHOR	METAPHOR	0.554252
5250		ACADEMIC	METAPHOR	METAPHOR	0.554142
5789		ACADEMIC	METAPHOR	METAPHOR	0.553846
2134		ACADEMIC	METAPHOR	METAPHOR	0.553698
2993		ACADEMIC	METAPHOR	METAPHOR	0.553571
6165		ACADEMIC	METAPHOR	METAPHOR	0.553571
2837		ACADEMIC	METAPHOR	METAPHOR	0.553556
5064		ACADEMIC	METAPHOR	METAPHOR	0.553333
5343		ACADEMIC	METAPHOR	METAPHOR	0.553333
5428		ACADEMIC	METAPHOR	METAPHOR	0.553099
5549		ACADEMIC	METAPHOR	METAPHOR	0.552941
6140		ACADEMIC	METAPHOR	METAPHOR	0.552941
6196		ACADEMIC	METAPHOR	METAPHOR	0.552941
3687		ACADEMIC	METAPHOR	METAPHOR	0.552893
5236		ACADEMIC	METAPHOR	METAPHOR	0.552778
5426		ACADEMIC	METAPHOR	METAPHOR	0.552778
6137		ACADEMIC	METAPHOR	METAPHOR	0.552778
5288		ACADEMIC	METAPHOR	METAPHOR	0.552778
2189		ACADEMIC	METAPHOR	METAPHOR	0.552778
5172		ACADEMIC	METAPHOR	METAPHOR	0.552632
2876		ACADEMIC	METAPHOR	METAPHOR	0.552126
3755		ACADEMIC	METAPHOR	METAPHOR	0.552071
5434		ACADEMIC	METAPHOR	METAPHOR	0.551923
2155		ACADEMIC	METAPHOR	METAPHOR	0.551562
5750		ACADEMIC	METAPHOR	METAPHOR	0.551389
5489		ACADEMIC	METAPHOR	METAPHOR	0.551172
5128		ACADEMIC	METAPHOR	METAPHOR	0.55102
5423		ACADEMIC	METAPHOR	METAPHOR	0.550781
2221		ACADEMIC	METAPHOR	METAPHOR	0.550781
2152		ACADEMIC	METAPHOR	METAPHOR	0.550694
3733		ACADEMIC	METAPHOR	METAPHOR	0.55061
1136		ACADEMIC	METAPHOR	METAPHOR	0.550521
2709		ACADEMIC	METAPHOR	METAPHOR	0.55051
2866		ACADEMIC	METAPHOR	METAPHOR	0.55051
2211		ACADEMIC	METAPHOR	METAPHOR	0.55051
2730		ACADEMIC	METAPHOR	METAPHOR	0.550391
6190		ACADEMIC	METAPHOR	METAPHOR	0.550391
2925		ACADEMIC	METAPHOR	METAPHOR	0.550391
5688		ACADEMIC	METAPHOR	METAPHOR	0.550391
5298		ACADEMIC	METAPHOR	METAPHOR	0.550383
5488		ACADEMIC	METAPHOR	METAPHOR	0.55
3085		ACADEMIC	METAPHOR	METAPHOR	0.55
5318		ACADEMIC	METAPHOR	METAPHOR	0.55
2654		ACADEMIC	METAPHOR	METAPHOR	0.55
3027		ACADEMIC	METAPHOR	METAPHOR	0.55
6209		ACADEMIC	METAPHOR	METAPHOR	0.55
3105		ACADEMIC	METAPHOR	METAPHOR	0.55
5155		ACADEMIC	METAPHOR	METAPHOR	0.55
2649		ACADEMIC	METAPHOR	METAPHOR	0.55
5375		ACADEMIC	METAPHOR	METAPHOR	0.55
3094		ACADEMIC	METAPHOR	METAPHOR	0.55
5011		ACADEMIC	METAPHOR	METAPHOR	0.55
5269		ACADEMIC	METAPHOR	METAPHOR	0.55
5444		ACADEMIC	METAPHOR	METAPHOR	0.55
2875		ACADEMIC	METAPHOR	METAPHOR	0.55
5467		ACADEMIC	METAPHOR	METAPHOR	0.55
3685		ACADEMIC	METAPHOR	METAPHOR	0.55
5604		ACADEMIC	METAPHOR	METAPHOR	0.549221
2142		ACADEMIC	METAPHOR	METAPHOR	0.548684
5680		ACADEMIC	METAPHOR	METAPHOR	0.548529
5583		ACADEMIC	METAPHOR	METAPHOR	0.548333
2661		ACADEMIC	METAPHOR	METAPHOR	0.548333
2208		ACADEMIC	METAPHOR	METAPHOR	0.548199
2740		ACADEMIC	METAPHOR	METAPHOR	0.548
2833		ACADEMIC	METAPHOR	METAPHOR	0.547917
2977		ACADEMIC	METAPHOR	METAPHOR	0.547751
6198		ACADEMIC	METAPHOR	METAPHOR	0.547414
5629		ACADEMIC	METAPHOR	METAPHOR	0.547405
6122		ACADEMIC	METAPHOR	METAPHOR	0.547222
5079		ACADEMIC	METAPHOR	METAPHOR	0.547111
5483		ACADEMIC	METAPHOR	METAPHOR	0.547059
3729		ACADEMIC	METAPHOR	METAPHOR	0.546667
5311		ACADEMIC	METAPHOR	METAPHOR	0.546655
2697		ACADEMIC	METAPHOR	METAPHOR	0.546626
6189		ACADEMIC	METAPHOR	METAPHOR	0.546429
6212		ACADEMIC	METAPHOR	METAPHOR	0.546429
5475		ACADEMIC	METAPHOR	METAPHOR	0.546429
3041		ACADEMIC	METAPHOR	METAPHOR	0.546429
5633		ACADEMIC	METAPHOR	METAPHOR	0.546429
5186		ACADEMIC	METAPHOR	METAPHOR	0.546281
2717		ACADEMIC	METAPHOR	METAPHOR	0.546181
5221		ACADEMIC	METAPHOR	METAPHOR	0.546154
5609		ACADEMIC	METAPHOR	METAPHOR	0.546154
6127		ACADEMIC	METAPHOR	METAPHOR	0.546154
2194		ACADEMIC	METAPHOR	METAPHOR	0.545588
5645		ACADEMIC	METAPHOR	METAPHOR	0.5455
2674		ACADEMIC	METAPHOR	METAPHOR	0.545455
5021		ACADEMIC	METAPHOR	METAPHOR	0.545455
2996		ACADEMIC	METAPHOR	METAPHOR	0.545455
2983		ACADEMIC	METAPHOR	METAPHOR	0.545062
5137		ACADEMIC	METAPHOR	METAPHOR	0.545
5539		ACADEMIC	METAPHOR	METAPHOR	0.545
5734		ACADEMIC	METAPHOR	METAPHOR	0.545
3495		ACADEMIC	METAPHOR	METAPHOR	0.544922
2873		ACADEMIC	METAPHOR	METAPHOR	0.544754
5209		ACADEMIC	METAPHOR	METAPHOR	0.544728
2680		ACADEMIC	METAPHOR	METAPHOR	0.544697
2961		ACADEMIC	METAPHOR	METAPHOR	0.544444
6207		ACADEMIC	METAPHOR	METAPHOR	0.544231
4989		ACADEMIC	METAPHOR	METAPHOR	0.544141
1135		ACADEMIC	METAPHOR	METAPHOR	0.544067
5516		ACADEMIC	METAPHOR	METAPHOR	0.544008
2642		ACADEMIC	METAPHOR	METAPHOR	0.54375
2975		ACADEMIC	METAPHOR	METAPHOR	0.54375
6131		ACADEMIC	METAPHOR	METAPHOR	0.543367
5238		ACADEMIC	METAPHOR	METAPHOR	0.543339
5762		ACADEMIC	METAPHOR	METAPHOR	0.543339
2170		ACADEMIC	METAPHOR	METAPHOR	0.543056
2845		ACADEMIC	METAPHOR	METAPHOR	0.543056
5522		ACADEMIC	METAPHOR	METAPHOR	0.542901
3698		ACADEMIC	METAPHOR	METAPHOR	0.542857
2821		ACADEMIC	METAPHOR	METAPHOR	0.542361
2207		ACADEMIC	METAPHOR	METAPHOR	0.542361
3686		ACADEMIC	METAPHOR	METAPHOR	0.542361
2829		ACADEMIC	METAPHOR	METAPHOR	0.54216
2230		ACADEMIC	METAPHOR	METAPHOR	0.541667
5528		ACADEMIC	METAPHOR	METAPHOR	0.541667
2805		ACADEMIC	METAPHOR	METAPHOR	0.541667
2100		ACADEMIC	METAPHOR	METAPHOR	0.541667
4995		ACADEMIC	METAPHOR	METAPHOR	0.541667
2734		ACADEMIC	METAPHOR	METAPHOR	0.541667
5433		ACADEMIC	METAPHOR	METAPHOR	0.541667
5564		ACADEMIC	METAPHOR	METAPHOR	0.541667
2901		ACADEMIC	METAPHOR	METAPHOR	0.541667
2929		ACADEMIC	METAPHOR	METAPHOR	0.541617
5530		ACADEMIC	METAPHOR	METAPHOR	0.541522
6192		ACADEMIC	METAPHOR	METAPHOR	0.541522
6222		ACADEMIC	METAPHOR	METAPHOR	0.541522
1140		ACADEMIC	METAPHOR	METAPHOR	0.541176
2855		ACADEMIC	METAPHOR	METAPHOR	0.541176
3039		ACADEMIC	METAPHOR	METAPHOR	0.541176
5051		ACADEMIC	METAPHOR	METAPHOR	0.541176
5360		ACADEMIC	METAPHOR	METAPHOR	0.541
5383		ACADEMIC	METAPHOR	METAPHOR	0.540976
5427		ACADEMIC	METAPHOR	METAPHOR	0.540889
6113		ACADEMIC	METAPHOR	METAPHOR	0.540533
3078		ACADEMIC	METAPHOR	METAPHOR	0.540444
5411		ACADEMIC	METAPHOR	METAPHOR	0.540406
6181		ACADEMIC	METAPHOR	METAPHOR	0.54032
1191		ACADEMIC	METAPHOR	METAPHOR	0.540306
5660		ACADEMIC	METAPHOR	METAPHOR	0.540289
2895		ACADEMIC	METAPHOR	METAPHOR	0.540052
5043		ACADEMIC	METAPHOR	METAPHOR	0.540052
5391		ACADEMIC	METAPHOR	METAPHOR	0.54
5490		ACADEMIC	METAPHOR	METAPHOR	0.54
5160		ACADEMIC	METAPHOR	METAPHOR	0.54
2906		ACADEMIC	METAPHOR	METAPHOR	0.54
5135		ACADEMIC	METAPHOR	METAPHOR	0.539706
2116		ACADEMIC	METAPHOR	METAPHOR	0.539668
2984		ACADEMIC	METAPHOR	METAPHOR	0.539286
5693		ACADEMIC	METAPHOR	METAPHOR	0.539286
5640		ACADEMIC	METAPHOR	METAPHOR	0.539286
5226		ACADEMIC	METAPHOR	METAPHOR	0.539198
2111		ACADEMIC	METAPHOR	METAPHOR	0.539198
2135		ACADEMIC	METAPHOR	METAPHOR	0.539062
5525		ACADEMIC	METAPHOR	METAPHOR	0.539053
2945		ACADEMIC	METAPHOR	METAPHOR	0.539053
5253		ACADEMIC	METAPHOR	METAPHOR	0.539053
2978		ACADEMIC	METAPHOR	METAPHOR	0.538989
5175		ACADEMIC	METAPHOR	METAPHOR	0.538843
5399		ACADEMIC	METAPHOR	METAPHOR	0.538667
3677		ACADEMIC	METAPHOR	METAPHOR	0.538636
3007		ACADEMIC	METAPHOR	METAPHOR	0.538611
5376		ACADEMIC	METAPHOR	METAPHOR	0.538609
5293		ACADEMIC	METAPHOR	METAPHOR	0.538549
2229		ACADEMIC	METAPHOR	METAPHOR	0.538322
5070		ACADEMIC	METAPHOR	METAPHOR	0.538281
5161		ACADEMIC	METAPHOR	METAPHOR	0.538095
5036		ACADEMIC	METAPHOR	METAPHOR	0.538017
5518		ACADEMIC	METAPHOR	METAPHOR	0.537891
3701		ACADEMIC	METAPHOR	METAPHOR	0.537891
5565		ACADEMIC	METAPHOR	METAPHOR	0.5375
5508		ACADEMIC	METAPHOR	METAPHOR	0.5375
5140		ACADEMIC	METAPHOR	METAPHOR	0.5375
5521		ACADEMIC	METAPHOR	METAPHOR	0.5375
6230		ACADEMIC	METAPHOR	METAPHOR	0.5375
2670		ACADEMIC	METAPHOR	METAPHOR	0.5375
5671		ACADEMIC	METAPHOR	METAPHOR	0.5375
5280		ACADEMIC	METAPHOR	METAPHOR	0.53713
2695		ACADEMIC	METAPHOR	METAPHOR	0.537111
2832		ACADEMIC	METAPHOR	METAPHOR	0.537018
5504		ACADEMIC	METAPHOR	METAPHOR	0.536905
2974		ACADEMIC	METAPHOR	METAPHOR	0.536842
6168		ACADEMIC	METAPHOR	METAPHOR	0.536538
5056		ACADEMIC	METAPHOR	METAPHOR	0.536538
3091		ACADEMIC	METAPHOR	METAPHOR	0.536497
5692		ACADEMIC	METAPHOR	METAPHOR	0.53642
2920		ACADEMIC	METAPHOR	METAPHOR	0.536332
2926		ACADEMIC	METAPHOR	METAPHOR	0.536332
3001		ACADEMIC	METAPHOR	METAPHOR	0.53632
2900		ACADEMIC	METAPHOR	METAPHOR	0.536224
2744		ACADEMIC	METAPHOR	METAPHOR	0.536
5107		ACADEMIC	METAPHOR	METAPHOR	0.535714
3744		ACADEMIC	METAPHOR	METAPHOR	0.535714
2679		ACADEMIC	METAPHOR	METAPHOR	0.53564
5368		ACADEMIC	METAPHOR	METAPHOR	0.53564
6200		ACADEMIC	METAPHOR	METAPHOR	0.53564
5249		ACADEMIC	METAPHOR	METAPHOR	0.535294
5049		ACADEMIC	METAPHOR	METAPHOR	0.535294
5796		ACADEMIC	METAPHOR	METAPHOR	0.53525
3096		ACADEMIC	METAPHOR	METAPHOR	0.535161
5204		ACADEMIC	METAPHOR	METAPHOR	0.535
1119		ACADEMIC	METAPHOR	METAPHOR	0.534722
1169		ACADEMIC	METAPHOR	METAPHOR	0.534298
3028		ACADEMIC	METAPHOR	METAPHOR	0.534184
2939		ACADEMIC	METAPHOR	METAPHOR	0.534091
6151		ACADEMIC	METAPHOR	METAPHOR	0.533824
2191		ACADEMIC	METAPHOR	METAPHOR	0.533778
2973		ACADEMIC	METAPHOR	METAPHOR	0.533778
2899		ACADEMIC	METAPHOR	METAPHOR	0.533778
3098		ACADEMIC	METAPHOR	METAPHOR	0.533642
4996		ACADEMIC	METAPHOR	METAPHOR	0.533449
1163		ACADEMIC	METAPHOR	METAPHOR	0.533333
3103		ACADEMIC	METAPHOR	METAPHOR	0.533333
2879		ACADEMIC	METAPHOR	METAPHOR	0.533333
3018		ACADEMIC	METAPHOR	METAPHOR	0.533333
5178		ACADEMIC	METAPHOR	METAPHOR	0.533333
2658		ACADEMIC	METAPHOR	METAPHOR	0.532692
3065		ACADEMIC	METAPHOR	METAPHOR	0.532422
6138		ACADEMIC	METAPHOR	METAPHOR	0.53241
2877		ACADEMIC	METAPHOR	METAPHOR	0.532031
6229		ACADEMIC	METAPHOR	METAPHOR	0.532031
2801		ACADEMIC	METAPHOR	METAPHOR	0.532031
5309		ACADEMIC	METAPHOR	METAPHOR	0.532
1149		ACADEMIC	METAPHOR	METAPHOR	0.53179
3089		ACADEMIC	METAPHOR	METAPHOR	0.531641
2097		ACADEMIC	METAPHOR	METAPHOR	0.531641
2842		ACADEMIC	METAPHOR	METAPHOR	0.531641
5632		ACADEMIC	METAPHOR	METAPHOR	0.531579
2852		ACADEMIC	METAPHOR	METAPHOR	0.531522
1146		ACADEMIC	METAPHOR	METAPHOR	0.531361
5527		ACADEMIC	METAPHOR	METAPHOR	0.531361
6123		ACADEMIC	METAPHOR	METAPHOR	0.53125
1116		ACADEMIC	METAPHOR	METAPHOR	0.53125
5319		ACADEMIC	METAPHOR	METAPHOR	0.53125
2733		ACADEMIC	METAPHOR	METAPHOR	0.531
2220		ACADEMIC	METAPHOR	METAPHOR	0.530864
5706		ACADEMIC	METAPHOR	METAPHOR	0.5305
2795		ACADEMIC	METAPHOR	METAPHOR	0.53045
1179		ACADEMIC	METAPHOR	METAPHOR	0.53025
1177		ACADEMIC	METAPHOR	METAPHOR	0.53025
3051		ACADEMIC	METAPHOR	METAPHOR	0.53025
5213		ACADEMIC	METAPHOR	METAPHOR	0.53
5097		ACADEMIC	METAPHOR	METAPHOR	0.53
6147		ACADEMIC	METAPHOR	METAPHOR	0.529959
2858		ACADEMIC	METAPHOR	METAPHOR	0.529758
5714		ACADEMIC	METAPHOR	METAPHOR	0.529758
2223		ACADEMIC	METAPHOR	METAPHOR	0.529758
5580		ACADEMIC	METAPHOR	METAPHOR	0.529758
5722		ACADEMIC	METAPHOR	METAPHOR	0.529758
4990		ACADEMIC	METAPHOR	METAPHOR	0.529438
5275		ACADEMIC	METAPHOR	METAPHOR	0.529412
2096		ACADEMIC	METAPHOR	METAPHOR	0.529412
5409		ACADEMIC	METAPHOR	METAPHOR	0.529412
5718		ACADEMIC	METAPHOR	METAPHOR	0.52934
5449		ACADEMIC	METAPHOR	METAPHOR	0.529082
5276		ACADEMIC	METAPHOR	METAPHOR	0.529082
5413		ACADEMIC	METAPHOR	METAPHOR	0.529025
5141		ACADEMIC	METAPHOR	METAPHOR	0.528798
1160		ACADEMIC	METAPHOR	METAPHOR	0.528778
2777		ACADEMIC	METAPHOR	METAPHOR	0.528778
2840		ACADEMIC	METAPHOR	METAPHOR	0.528699
5109		ACADEMIC	METAPHOR	METAPHOR	0.528333
5138		ACADEMIC	METAPHOR	METAPHOR	0.528287
5228		ACADEMIC	METAPHOR	METAPHOR	0.528125
6182		ACADEMIC	METAPHOR	METAPHOR	0.528099
2767		ACADEMIC	METAPHOR	METAPHOR	0.528086
5025		ACADEMIC	METAPHOR	METAPHOR	0.528086
3026		ACADEMIC	METAPHOR	METAPHOR	0.528
5689		ACADEMIC	METAPHOR	METAPHOR	0.527941
5654		ACADEMIC	METAPHOR	METAPHOR	0.527941
2765		ACADEMIC	METAPHOR	METAPHOR	0.527834
5370		ACADEMIC	METAPHOR	METAPHOR	0.527824
5574		ACADEMIC	METAPHOR	METAPHOR	0.527686
5379		ACADEMIC	METAPHOR	METAPHOR	0.527479
5329		ACADEMIC	METAPHOR	METAPHOR	0.527273
5378		ACADEMIC	METAPHOR	METAPHOR	0.527111
5108		ACADEMIC	METAPHOR	METAPHOR	0.526923
5350		ACADEMIC	METAPHOR	METAPHOR	0.52687
5054		ACADEMIC	METAPHOR	METAPHOR	0.526235
5023		ACADEMIC	METAPHOR	METAPHOR	0.525926
5210		ACADEMIC	METAPHOR	METAPHOR	0.525781
1187		ACADEMIC	METAPHOR	METAPHOR	0.525781
2655		ACADEMIC	METAPHOR	METAPHOR	0.525781
3675		ACADEMIC	METAPHOR	METAPHOR	0.525694
2827		ACADEMIC	METAPHOR	METAPHOR	0.52562
5053		ACADEMIC	METAPHOR	METAPHOR	0.525554
5244		ACADEMIC	METAPHOR	METAPHOR	0.5255
5731		ACADEMIC	METAPHOR	METAPHOR	0.5255
5077		ACADEMIC	METAPHOR	METAPHOR	0.525391
5198		ACADEMIC	METAPHOR	METAPHOR	0.525391
2098		ACADEMIC	METAPHOR	METAPHOR	0.525296
2198		ACADEMIC	METAPHOR	METAPHOR	0.52525
2702		ACADEMIC	METAPHOR	METAPHOR	0.52525
1112		ACADEMIC	METAPHOR	METAPHOR	0.52525
5006		ACADEMIC	METAPHOR	METAPHOR	0.525174
5352		ACADEMIC	METAPHOR	METAPHOR	0.525
2118		ACADEMIC	METAPHOR	METAPHOR	0.525
5726		ACADEMIC	METAPHOR	METAPHOR	0.525
2980		ACADEMIC	METAPHOR	METAPHOR	0.525
3749		ACADEMIC	METAPHOR	METAPHOR	0.525
5448		ACADEMIC	METAPHOR	METAPHOR	0.525
2749		ACADEMIC	METAPHOR	METAPHOR	0.525
5768		ACADEMIC	METAPHOR	METAPHOR	0.525
2197		ACADEMIC	METAPHOR	METAPHOR	0.525
3022		ACADEMIC	METAPHOR	METAPHOR	0.525
5326		ACADEMIC	METAPHOR	METAPHOR	0.525
5459		ACADEMIC	METAPHOR	METAPHOR	0.525
3752		ACADEMIC	METAPHOR	METAPHOR	0.525
5454		ACADEMIC	METAPHOR	METAPHOR	0.525
5736		ACADEMIC	METAPHOR	METAPHOR	0.525
2656		ACADEMIC	METAPHOR	METAPHOR	0.525
2131		ACADEMIC	METAPHOR	METAPHOR	0.525
2924		ACADEMIC	METAPHOR	METAPHOR	0.525
2800		ACADEMIC	METAPHOR	METAPHOR	0.525
3077		ACADEMIC	METAPHOR	METAPHOR	0.524238
3730		ACADEMIC	METAPHOR	METAPHOR	0.52416
5030		ACADEMIC	METAPHOR	METAPHOR	0.524036
5566		ACADEMIC	METAPHOR	METAPHOR	0.524
5684		ACADEMIC	METAPHOR	METAPHOR	0.523875
5593		ACADEMIC	METAPHOR	METAPHOR	0.52381
5116		ACADEMIC	METAPHOR	METAPHOR	0.523529
5417		ACADEMIC	METAPHOR	METAPHOR	0.523529
3747		ACADEMIC	METAPHOR	METAPHOR	0.523457
5769		ACADEMIC	METAPHOR	METAPHOR	0.523015
6150		ACADEMIC	METAPHOR	METAPHOR	0.522846
5173		ACADEMIC	METAPHOR	METAPHOR	0.52284
1190		ACADEMIC	METAPHOR	METAPHOR	0.522531
6114		ACADEMIC	METAPHOR	METAPHOR	0.522405
5013		ACADEMIC	METAPHOR	METAPHOR	0.522405
2766		ACADEMIC	METAPHOR	METAPHOR	0.522368
5568		ACADEMIC	METAPHOR	METAPHOR	0.522359
5757		ACADEMIC	METAPHOR	METAPHOR	0.522222
2231		ACADEMIC	METAPHOR	METAPHOR	0.522059
5713		ACADEMIC	METAPHOR	METAPHOR	0.522
1114		ACADEMIC	METAPHOR	METAPHOR	0.521939
5231		ACADEMIC	METAPHOR	METAPHOR	0.521939
2127		ACADEMIC	METAPHOR	METAPHOR	0.521939
2931		ACADEMIC	METAPHOR	METAPHOR	0.521746
5556		ACADEMIC	METAPHOR	METAPHOR	0.521739
2838		ACADEMIC	METAPHOR	METAPHOR	0.521528
3045		ACADEMIC	METAPHOR	METAPHOR	0.521281
3043		ACADEMIC	METAPHOR	METAPHOR	0.521181
5194		ACADEMIC	METAPHOR	METAPHOR	0.521154
5571		ACADEMIC	METAPHOR	METAPHOR	0.521007
2897		ACADEMIC	METAPHOR	METAPHOR	0.521
2994		ACADEMIC	METAPHOR	METAPHOR	0.520934
5142		ACADEMIC	METAPHOR	METAPHOR	0.520889
2830		ACADEMIC	METAPHOR	METAPHOR	0.520796
2791		ACADEMIC	METAPHOR	METAPHOR	0.520568
2864		ACADEMIC	METAPHOR	METAPHOR	0.520444
5034		ACADEMIC	METAPHOR	METAPHOR	0.52025
5300		ACADEMIC	METAPHOR	METAPHOR	0.52025
1170		ACADEMIC	METAPHOR	METAPHOR	0.52
5257		ACADEMIC	METAPHOR	METAPHOR	0.52
3071		ACADEMIC	METAPHOR	METAPHOR	0.52
5273		ACADEMIC	METAPHOR	METAPHOR	0.52
5170		ACADEMIC	METAPHOR	METAPHOR	0.519565
5515		ACADEMIC	METAPHOR	METAPHOR	0.519531
5156		ACADEMIC	METAPHOR	METAPHOR	0.519464
5559		ACADEMIC	METAPHOR	METAPHOR	0.519444
5150		ACADEMIC	METAPHOR	METAPHOR	0.519444
1178		ACADEMIC	METAPHOR	METAPHOR	0.519444
2652		ACADEMIC	METAPHOR	METAPHOR	0.519444
5027		ACADEMIC	METAPHOR	METAPHOR	0.519141
5076		ACADEMIC	METAPHOR	METAPHOR	0.519141
2848		ACADEMIC	METAPHOR	METAPHOR	0.519083
5189		ACADEMIC	METAPHOR	METAPHOR	0.519008
5430		ACADEMIC	METAPHOR	METAPHOR	0.519
3070		ACADEMIC	METAPHOR	METAPHOR	0.518878
2844		ACADEMIC	METAPHOR	METAPHOR	0.518778
2724		ACADEMIC	METAPHOR	METAPHOR	0.51875
1167		ACADEMIC	METAPHOR	METAPHOR	0.51875
2935		ACADEMIC	METAPHOR	METAPHOR	0.51875
5788		ACADEMIC	METAPHOR	METAPHOR	0.51875
3095		ACADEMIC	METAPHOR	METAPHOR	0.518685
1132		ACADEMIC	METAPHOR	METAPHOR	0.51859
5534		ACADEMIC	METAPHOR	METAPHOR	0.518537
3674		ACADEMIC	METAPHOR	METAPHOR	0.518182
5728		ACADEMIC	METAPHOR	METAPHOR	0.518056
6228		ACADEMIC	METAPHOR	METAPHOR	0.518056
2843		ACADEMIC	METAPHOR	METAPHOR	0.517899
3029		ACADEMIC	METAPHOR	METAPHOR	0.517857
5634		ACADEMIC	METAPHOR	METAPHOR	0.517769
1139		ACADEMIC	METAPHOR	METAPHOR	0.517647
2128		ACADEMIC	METAPHOR	METAPHOR	0.517647
2757		ACADEMIC	METAPHOR	METAPHOR	0.517647
2859		ACADEMIC	METAPHOR	METAPHOR	0.517391
3021		ACADEMIC	METAPHOR	METAPHOR	0.516942
3764		ACADEMIC	METAPHOR	METAPHOR	0.516667
5176		ACADEMIC	METAPHOR	METAPHOR	0.516667
5396		ACADEMIC	METAPHOR	METAPHOR	0.516667
5502		ACADEMIC	METAPHOR	METAPHOR	0.516667
6134		ACADEMIC	METAPHOR	METAPHOR	0.516522
6153		ACADEMIC	METAPHOR	METAPHOR	0.516358
6217		ACADEMIC	METAPHOR	METAPHOR	0.516333
5179		ACADEMIC	METAPHOR	METAPHOR	0.516289
5201		ACADEMIC	METAPHOR	METAPHOR	0.516176
1147		ACADEMIC	METAPHOR	METAPHOR	0.51593
2233		ACADEMIC	METAPHOR	METAPHOR	0.51575
5200		ACADEMIC	METAPHOR	METAPHOR	0.515444
5437		ACADEMIC	METAPHOR	METAPHOR	0.515385
3759		ACADEMIC	METAPHOR	METAPHOR	0.515
5588		ACADEMIC	METAPHOR	METAPHOR	0.515
6204		ACADEMIC	METAPHOR	METAPHOR	0.515
2963		ACADEMIC	METAPHOR	METAPHOR	0.514966
5419		ACADEMIC	METAPHOR	METAPHOR	0.514706
1180		ACADEMIC	METAPHOR	METAPHOR	0.514541
2780		ACADEMIC	METAPHOR	METAPHOR	0.514367
2794		ACADEMIC	METAPHOR	METAPHOR	0.514222
4994		ACADEMIC	METAPHOR	METAPHOR	0.514062
2922		ACADEMIC	METAPHOR	METAPHOR	0.513927
5199		ACADEMIC	METAPHOR	METAPHOR	0.513927
2678		ACADEMIC	METAPHOR	METAPHOR	0.513927
5168		ACADEMIC	METAPHOR	METAPHOR	0.513672
2872		ACADEMIC	METAPHOR	METAPHOR	0.513636
2132		ACADEMIC	METAPHOR	METAPHOR	0.51358
2965		ACADEMIC	METAPHOR	METAPHOR	0.513281
6124		ACADEMIC	METAPHOR	METAPHOR	0.513281
2213		ACADEMIC	METAPHOR	METAPHOR	0.513095
5655		ACADEMIC	METAPHOR	METAPHOR	0.512891
6202		ACADEMIC	METAPHOR	METAPHOR	0.512891
6156		ACADEMIC	METAPHOR	METAPHOR	0.512891
2224		ACADEMIC	METAPHOR	METAPHOR	0.512891
1162		ACADEMIC	METAPHOR	METAPHOR	0.5125
2874		ACADEMIC	METAPHOR	METAPHOR	0.5125
5047		ACADEMIC	METAPHOR	METAPHOR	0.5125
2861		ACADEMIC	METAPHOR	METAPHOR	0.5125
2126		ACADEMIC	METAPHOR	METAPHOR	0.5125
5553		ACADEMIC	METAPHOR	METAPHOR	0.5125
5439		ACADEMIC	METAPHOR	METAPHOR	0.512119
1192		ACADEMIC	METAPHOR	METAPHOR	0.512111
3753		ACADEMIC	METAPHOR	METAPHOR	0.512111
5345		ACADEMIC	METAPHOR	METAPHOR	0.511765
2811		ACADEMIC	METAPHOR	METAPHOR	0.511765
5042		ACADEMIC	METAPHOR	METAPHOR	0.511765
5727		ACADEMIC	METAPHOR	METAPHOR	0.511765
2959		ACADEMIC	METAPHOR	METAPHOR	0.511735
2190		ACADEMIC	METAPHOR	METAPHOR	0.511538
1123		ACADEMIC	METAPHOR	METAPHOR	0.511364
[truncated: 4,894 more rows]
